# Supplementary material for: Targeting the imperfections at the ZnO/CsPbI2Br interface for low-temperature carbon-based perovskite solar cells
Source: Royal Society of Chemistry journal article supplement (doi:10.1039/d3ta00493g), 2023-01-01
Supplement: d3ta00493g1.pdf [file d3ta00493g1.pdf]

## Supporting Information

### Targeting the imperfections at the ZnO/CsPbI<sub>2</sub>Br interface for low-temperature carbon-based perovskite solar cells

Xiang Zhang,<sup>‡a</sup> Dan Zhang,<sup>‡a</sup> Tonghui Guo,<sup>a</sup> Junjie Zou,<sup>a</sup> Junjun Jin,<sup>a</sup> Chunqiu Zheng,<sup>c</sup> Yuan Zhou,<sup>a</sup> Zhenkun Zhu,<sup>a</sup> Zhao Hu,<sup>d</sup> Qiang Cao,<sup>a</sup> Sujuan Wu,<sup>c</sup> Jing Zhang,<sup>b</sup> Qidong Tai<sup>\*a</sup>

<sup>a</sup> The Institute of Technological Sciences, Wuhan University, Wuhan 430072, P. R. China

<sup>b</sup> Department of Microelectronic Science and Engineering, Ningbo University, Zhejiang 315211, P. R. China

<sup>c</sup> Institute for Advanced Materials, South China Academy of Advanced Optoelectronics, South China Normal University, Guangzhou 510006, P. R. China

<sup>d</sup> School of Material Science & Engineering, Wuhan Institute of Technology, Wuhan 430073, PR China

<sup>‡</sup> These authors contributed equally to this work.

\* Corresponding authors. E-mail: qdtai@whu.edu.cn

## Experimental Section

### *Material*

Indium-doped tin oxide (ITO) glass (sheet resistance: 7-9  $\Omega$  sq<sup>-1</sup>), cesium iodide (CsI, 99.999%), [6,6]-phenyl-C<sub>61</sub>-butanoic acid methyl ester (PC<sub>61</sub>BM) and Lead (II) bromide (PbBr<sub>2</sub>, 99.999%) were bought from Advanced Election Technology Co., Ltd.. Lead iodide (PbI<sub>2</sub>, 99.99%) was purchased from Xi'an Polymer Light Technology Corp, China. Cesium acetate (CsAc, 99.9% metals basis), cesium trifluoroacetate (CsTFA) and chlorobenzene (CB, 99.9%) were provided by Alfa Aesar. Cesium fluoride (CsF, 99.9% trace metals basis), N,N-Dimethylformamide (DMF, 99.8%) and Dimethyl sulfoxide (DMSO,  $\geq$  99.9%) were obtained from Sigma-Aldrich. Zinc acetate dihydrate (Zn(Ac)<sub>2</sub>·2H<sub>2</sub>O, 99.995%), 2-Methoxyethanol (anhydrous, 99.8%) and ethanolamine (standard for GC, >99.5%) were gotten from Aladdin. Absolute ethanol, isopropyl alcohol (IPA) and acetone were received from Sinopharm. Commercial carbon pastes (MTW-CE-C-003) were purchased from Shanghai Materwin New Materials Co., Ltd.. Unless otherwise specified, all of materials and reagents were used as received without any further purification.

### *ZnO/doped ZnO Precursor Solution Preparation*

Zinc oxide (ZnO) precursor solution was prepared by dissolving 100 mg Zn(Ac)<sub>2</sub>·2H<sub>2</sub>O powder in 1 mL 2-Methoxyethanol and 27.5  $\mu$ l ethanolamine, and stirred at least 12 h and filtered through a pore 0.22  $\mu$ m PTFE filter before use. For doped ZnO precursor solution, different amounts of cesium modulators (CsF, CsAc and CsTFA) were added into the prepared ZnO precursor solution.

### *PC<sub>61</sub>BM Preparation*

PC<sub>61</sub>BM film was fabricated by spin-coating 20 mg mL<sup>-1</sup> PC<sub>61</sub>BM CB solution at 4000 rpm for 30 s in nitrogen (N<sub>2</sub>)-filled glovebox.

### *Device fabrication*

ITO glass substrate (1.5 cm  $\times$  1.5 cm) was cleaned by sequential ultrasonic treatment in detergent, deionized H<sub>2</sub>O, acetone, IPA and absolute ethanol, and then dried with N<sub>2</sub> flow and treated with ultraviolet (UV)-ozone for 15 min. After that, pristine or doped ZnO precursor solution was spin-coated on the ITO glass substrate at 4000 rpm for 40 s, followed by annealing at 150  $^{\circ}$ C for 30 min in humid air (25  $^{\circ}$ C, 60-65 % relative humidity (RH)). After cooling down to room temperature, the obtained glass/ITO/electron transport layer (ETL) substrate was immediately transferred into the N<sub>2</sub>-filled glovebox. To prepare perovskite film, CsPbI<sub>2</sub>Br precursor solution (1.2 M) was prepared by dissolving 1.2 M CsI, 0.6 M PbBr<sub>2</sub> and 0.6 M PbI<sub>2</sub> in the DMSO/ DMF mixed solvents (volume ratio = 4 : 6), and stirred at 70  $^{\circ}$ C until completely

dissolved. Then, it was filtered through a pore 0.22  $\mu\text{m}$  PTFE filter and spin-coated onto the glass/ITO/ETL substrate at 1000 rpm for 5 s and 3000 rpm for 30 s. Afterward, the glass/ITO/ETL/CsPbI<sub>2</sub>Br substrate was placed on a hotplate at 40 °C for 3 min and then at 160 °C for 10 min. Finally, commercial carbon paste was doctor-bladed onto the as-prepared CsPbI<sub>2</sub>Br film through a shadow mask with the active area of 0.09 cm<sup>2</sup>, followed by heating at 120 °C for 20 min to obtain C-IPSCs with a planar structure of glass/ITO/ETL/CsPbI<sub>2</sub>Br/carbon.

### ***Characterization***

Current density-voltage (J-V) curves were recorded on a Keithley 2400 source meter with a scan rate (reverse voltage from 1.5 to 0 V) of 100 m V s<sup>-1</sup> under an AM 1.5G illumination (100 mW cm<sup>-2</sup>) from a Newport solar simulator (Oriel So1 3A 94023A, USA, calibrated by an NREL-certified standard silicon solar cell). Conductivity ( $\sigma$ ), electron mobility ( $\mu_e$ ), space-charge-limited current (SCLC) model and dark J-V curves were collected by a Keithley 2400 source meter. The dependence of open-circuit voltage ( $V_{oc}$ ) and short-circuit current density ( $J_{sc}$ ) on light intensity ( $P_{light}$ ) was based on the J-V curves under different illuminations, which were modulated by a series of neutral density filters. External quantum efficiency (EQE) measurement was conducted on a quantum efficiency (QE) system (Enlitech, QE-R666) equipped with 75 W xenon lamp in DC mode. X-ray photoelectron spectroscopy (XPS) was characterized by an X-ray photoelectron spectrometer (Thermo Scientific K-Alpha+, USA) using an Al K $\alpha$  ( $h\nu = 1486.6$  eV) X-ray excitation source. The C 1s line at 284.6 eV was used to correct all XPS spectra. Ultraviolet photoelectron spectroscopy (UPS) was measured using an ESCALAB Xi+ system (Thermo Fisher, USA) with a He I ( $h\nu = 21.22$  eV) emission line at a base pressure of  $5 \times 10^{-8}$  Torr. X-ray diffraction (XRD) and depth-dependent grazing incident X-ray diffraction (GIXRD) patterns were analyzed by an X-ray diffractometer (Bruker D8 Advance, Germany) with an Cu K $\alpha$  ( $\lambda = 1.5406$  Å) radiation source under operating conditions of 40 kV and 40 mA. Fourier-transform infrared (FTIR) spectroscopy was collected using a Nicolet 5700 FTIR spectrometer (Thermo Scientific, USA) with an ATR-diamond. Surface morphology, cross-sectional structure and energy-dispersive X-ray spectroscopy (EDS) mapping image were obtained by a field-emission scanning electron microscopy (SEM) (Zeiss SIGMA, Germany). Atomic force microscopy (AFM) and Kelvin probe force microscopy (KPFM) images for ETLs were observed by an atomic force microscope (SPM-9700HT, Shimadzu, Japan). Contact angle was measured via an optical video contact angle instrument (Dataphysics OCA 20, Germany) and analyzed with its software. UV-visible (UV-vis) absorption and transmittance spectra were carried out on the UV-vis near-infrared spectrophotometer (Shimadzu UV-2600i, Japan). Steady-state photoluminescence (PL) and

time-resolved PL (TRPL) decay spectra were checked by a fluorescence lifetime spectrometer (Fluo Time 300, Germany) operated at 322 nm excitation laser. Transient absorption (TA) spectroscopy was monitored using a high-speed spectrometer (HARRIA-TA, Light Conversion) with a pump excitation wavelength of 532 nm, which was measured from back side of the perovskite film. Electrochemical impedance spectroscopy (EIS) was performed by an electrochemical workstation (Zahner, Germany) under the 10 mW cm<sup>-2</sup> white LED light, applying a 20 mV AC signal with a frequency range from 1 Hz to 1 MHz. The obtained EIS data were analyzed by the Z-View software (v2.8b, Scribner Associates, USA). Transient photocurrent (TPC) and transient photovoltage (TPV) decay curves were detected on an electrochemical workstation (Zahner, Germany) with a white light LED (80 mW cm<sup>-2</sup>). Capacitance-voltage (C<sup>2</sup>-V) measurements were also tested on an electrochemical workstation (Zahner, Germany). Unless stated otherwise, all of characterizations were carried out in ambient air (25 °C, 20-30% RH).

### Calculation

Calculations based on density functional theory (DFT) were conducted on the Gaussian 16 software.<sup>1</sup> The PBE0 functional and mixed basis set (SDD ECP basis set for Cs atom and the 6-311G(d) basis set for other atoms) were adopted for all calculations.<sup>2-4</sup> The DFT-D3 with BJ-damping was applied to correct the weak interaction to improve the calculation accuracy.<sup>5</sup> The IEFPCM implicit solvation model was used to account for the solvation effect.<sup>6</sup>

### Figure Section

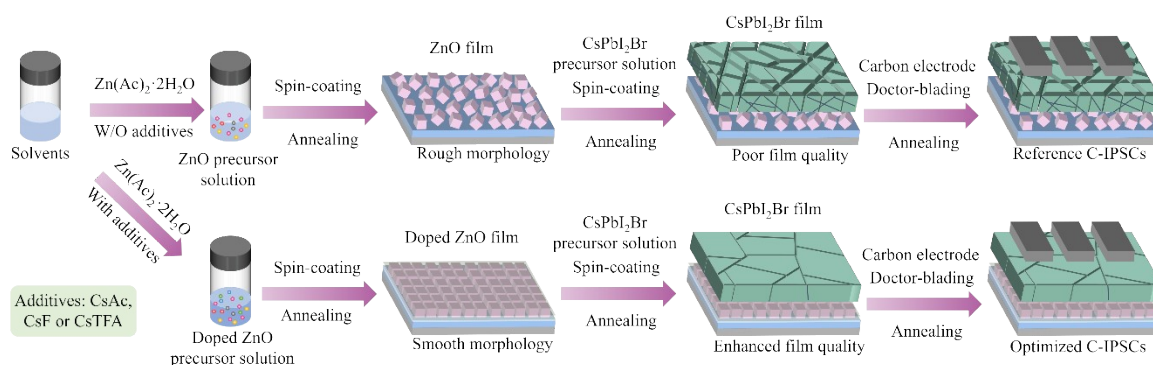

**Fig. S1** Schematic diagram for the fabrication process of CsPbI<sub>2</sub>Br C-IPSCs.

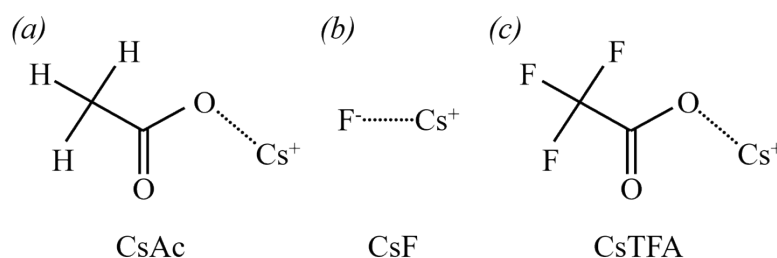

**Fig. S2** Molecular structure of (a) CsAc, (b) CsF, and (c) CsTFA.

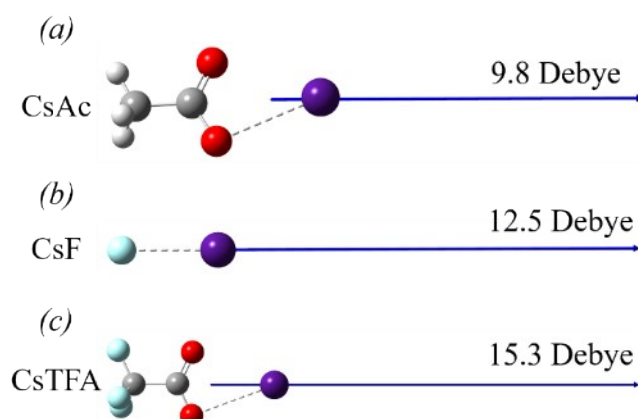

**Fig. S3** Dipole moment of (a) CsAc, (b) CsF, and (c) CsTFA.

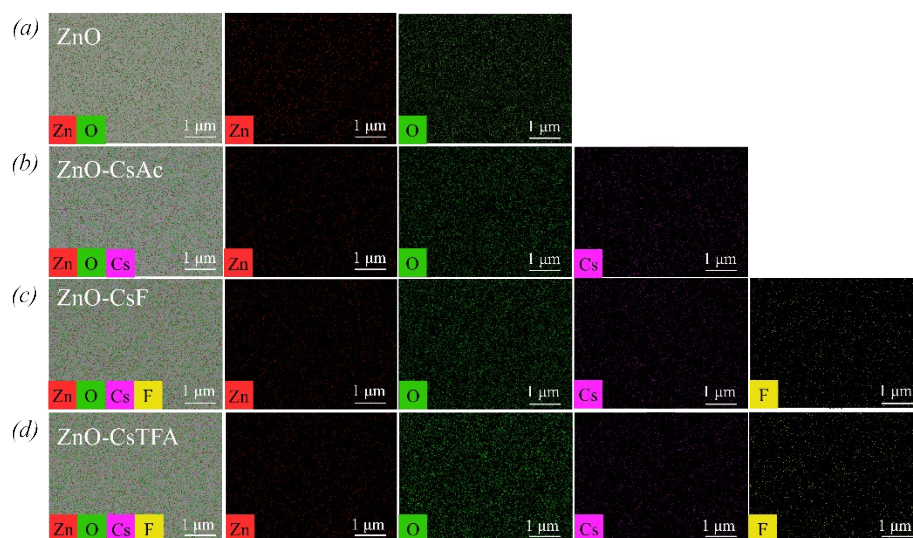

**Fig. S4** EDS mapping images of (a) ZnO, (b) ZnO-CsAc, (c) ZnO-CsF, and (d) ZnO-CsTFA ETLs.

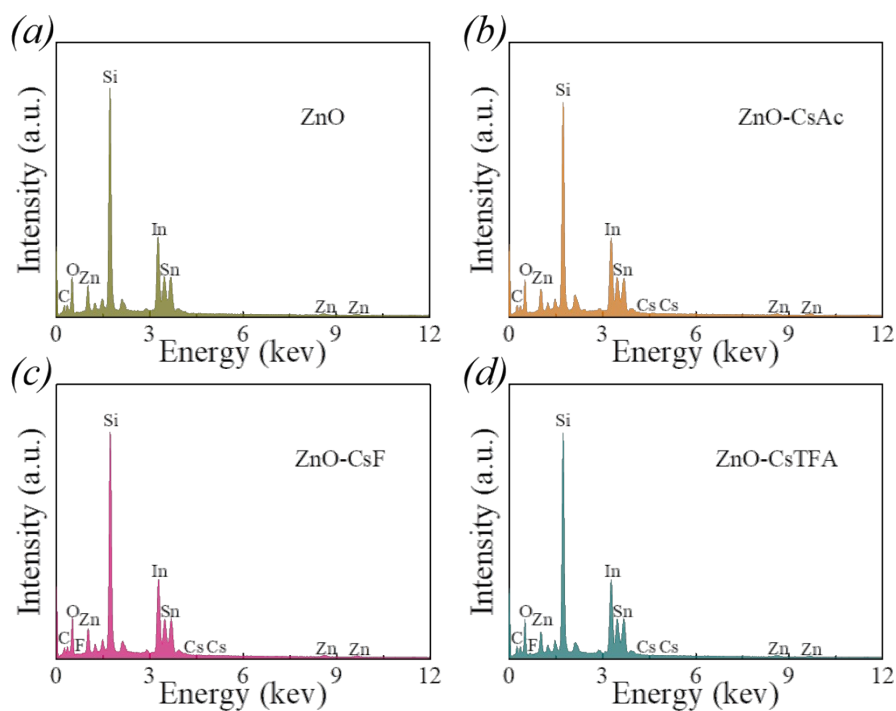

**Fig. S5** EDS analysis of (a) ZnO, (b) ZnO-CsAc, (c) ZnO-CsF, and (d) ZnO-CsTFA ETLs.

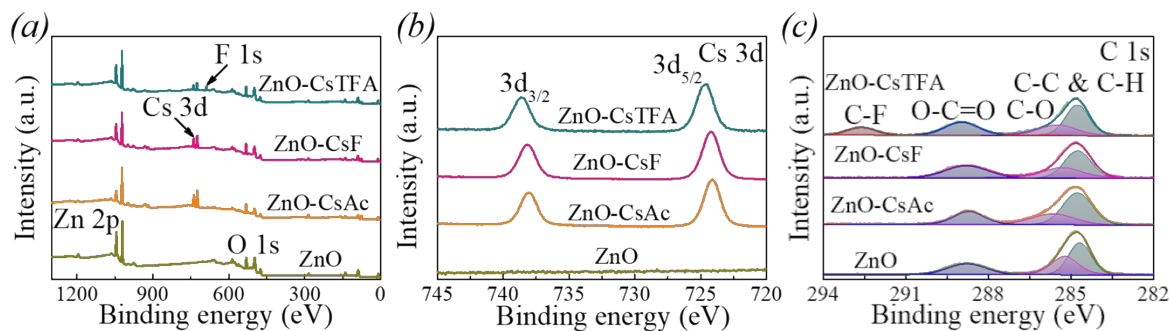

**Fig. S6** (a) Full XPS survey spectra. (b) Cs 3d and (c) C 1s XPS spectra of pristine and doped ZnO ETLs.

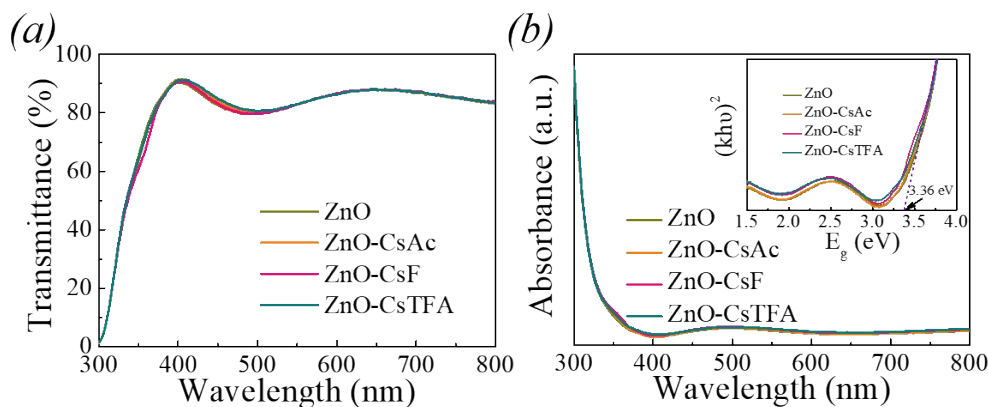

**Fig. S7** (a) Transmittance spectra and (b) UV-vis absorption spectra of pristine and doped ZnO ETLs. Inset: corresponding  $E_g$  values.

The band gap ( $E_g$ ) of pristine and doped ZnO ETLs can be calculated by the Tauc plots transformed from the UV-vis absorption spectra via Equation S1:<sup>7</sup>

$$\psi(h\nu) = \xi(h\nu - E_g)^{1/2} \quad \text{Equation S1}$$

where  $\psi$ ,  $h\nu$ , and  $\xi$  are the absorption coefficient, photo energy, and arbitrary constant, respectively.

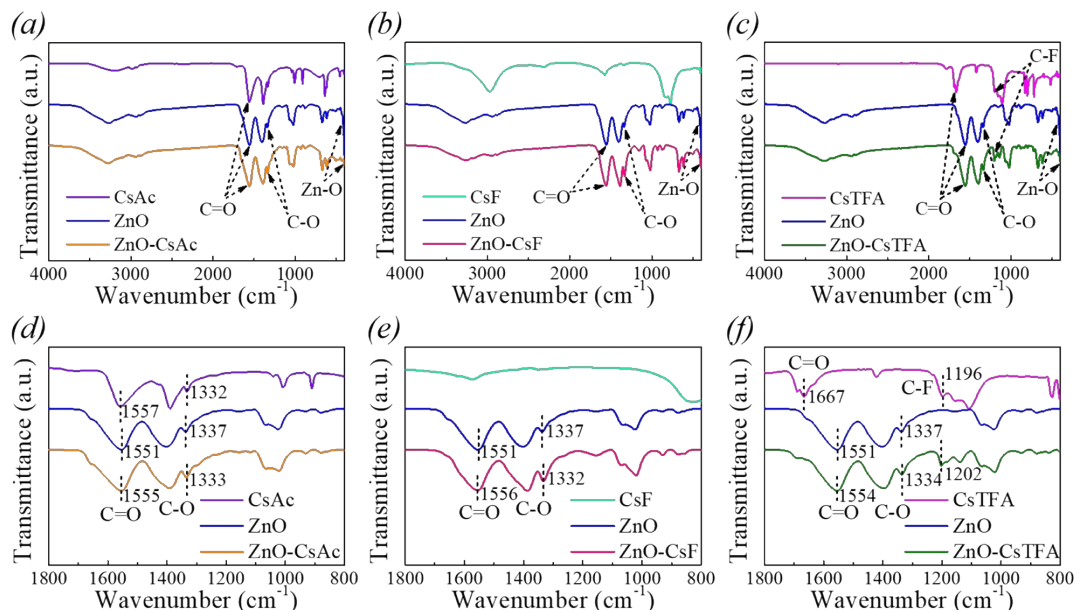

**Fig. S8** FTIR spectra of cesium modulators, pristine, and doped ZnO films.

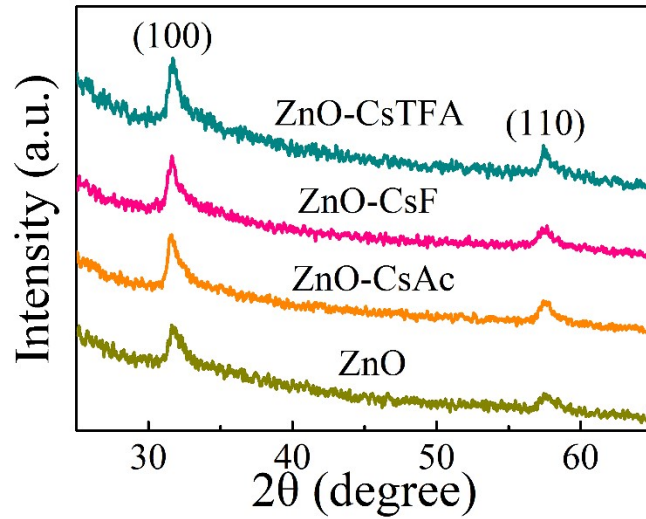

**Fig. S9** XRD patterns of pristine and doped ZnO ETLs.

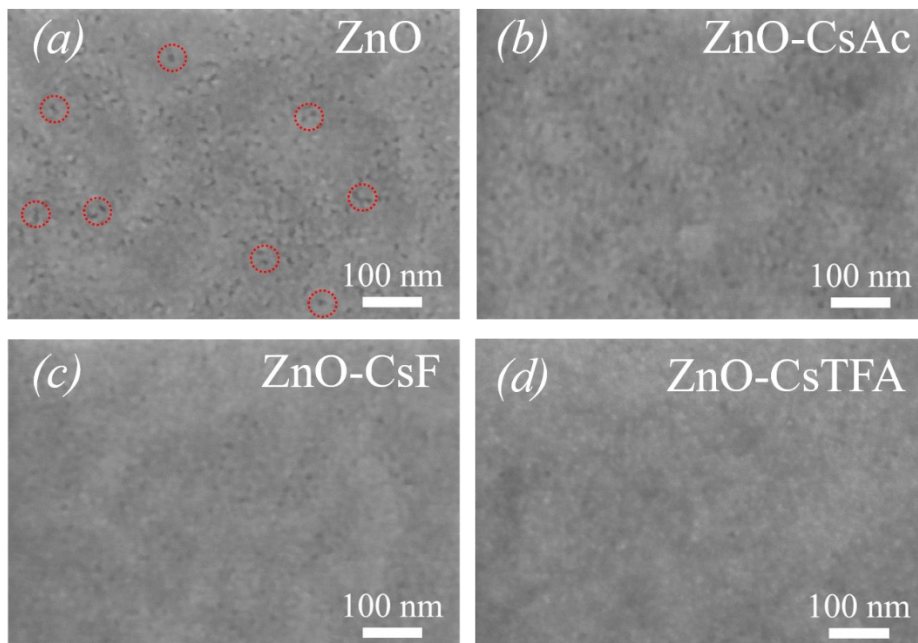

**Fig. S10** Top-view SEM images of (a) ZnO, (b) ZnO-CsAc, (c) ZnO-CsF, and (d) ZnO-CsTFA ETLs.

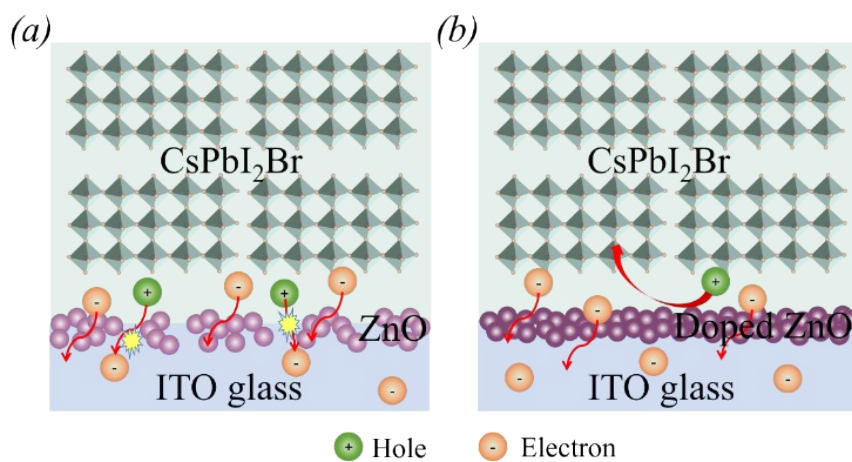

**Fig. S11** Schematic illustration of ETL/ $\text{CsPbI}_2\text{Br}$  interfacial contact.

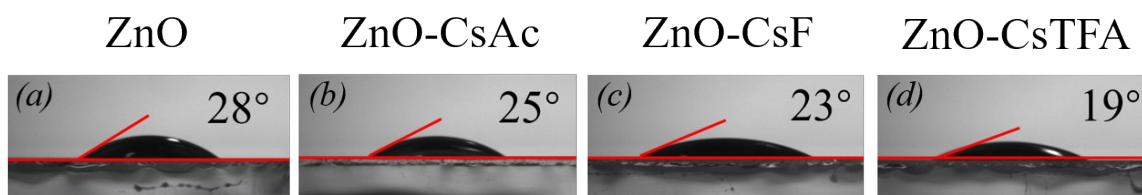

**Fig. S12** DMSO/DMF contact angle images of (a) ZnO, (b) ZnO-CsAc, (c) ZnO-CsF, and (d) ZnO-CsTFA ETLs.

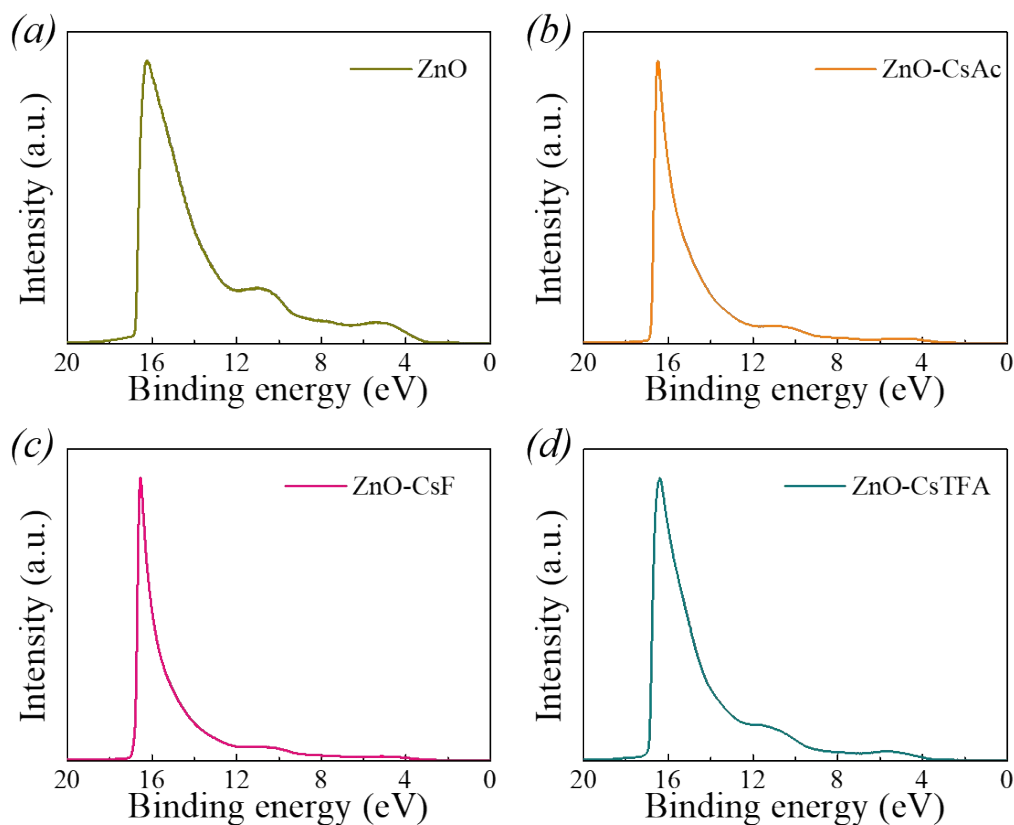

**Fig. S13** UPS spectra of (a) ZnO, (b) ZnO-CsAc, (c) ZnO-CsF, and (d) ZnO-CsTFA ETLs.

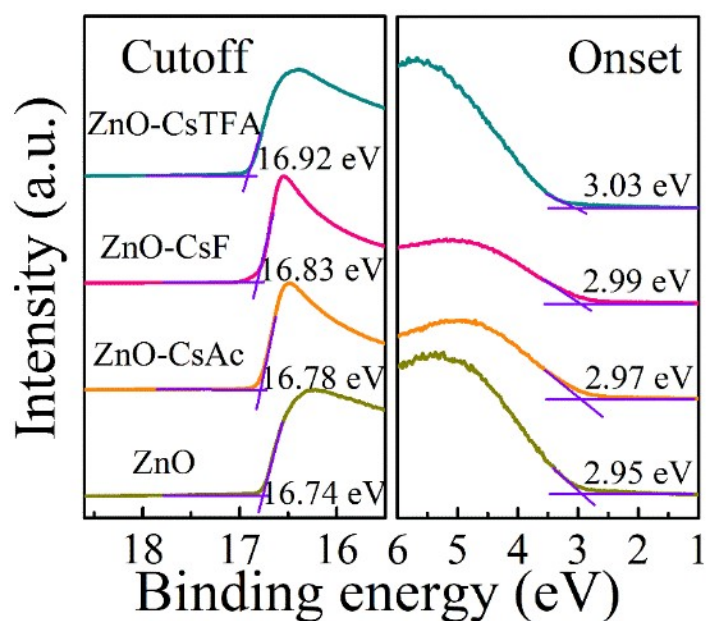

**Fig. S14** Detailed parameters derived from the UPS spectra for pristine and ZnO ETLs.



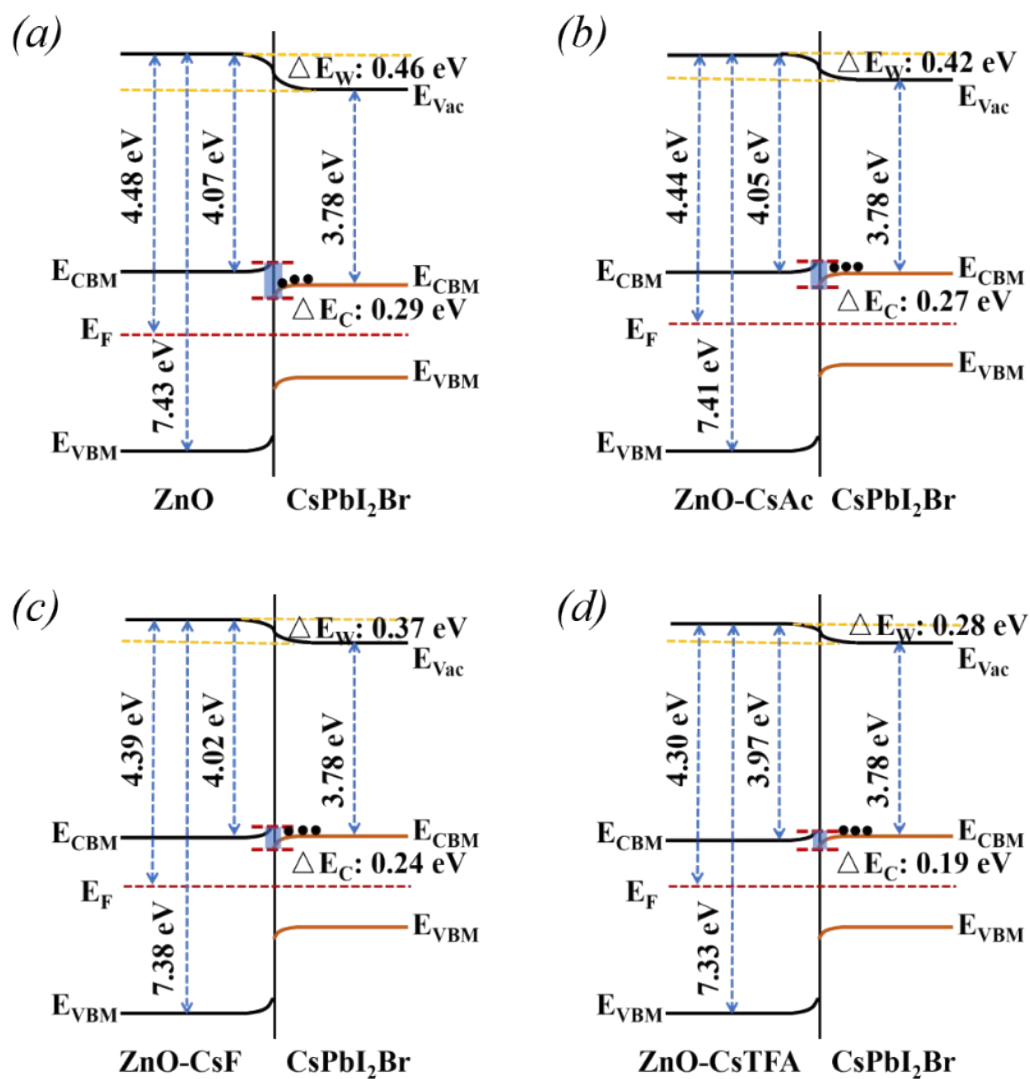

**Fig. S15** Energy level diagram for pristine and doped ZnO ETLs compared with CsPbI<sub>2</sub>Br films.

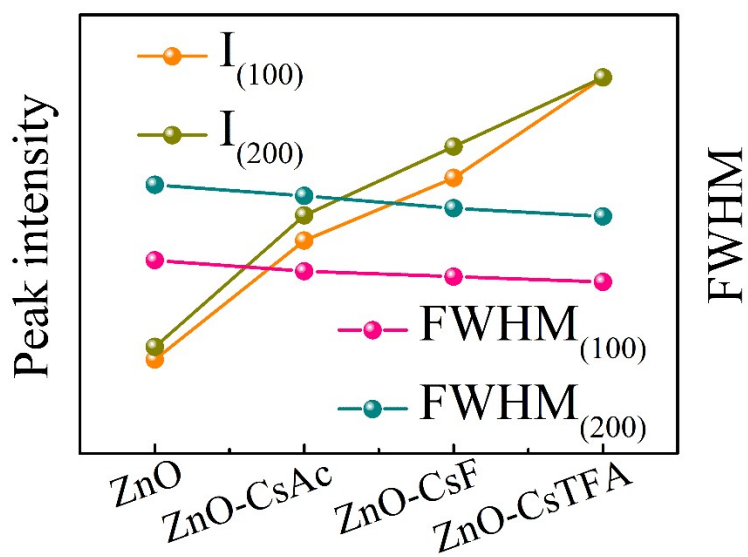

**Fig. S16** The relative normalized XRD peak intensity and full-width-at-half-maximum (FWHM) of CsPbI<sub>2</sub>Br films on the pristine and doped ZnO ETLs.

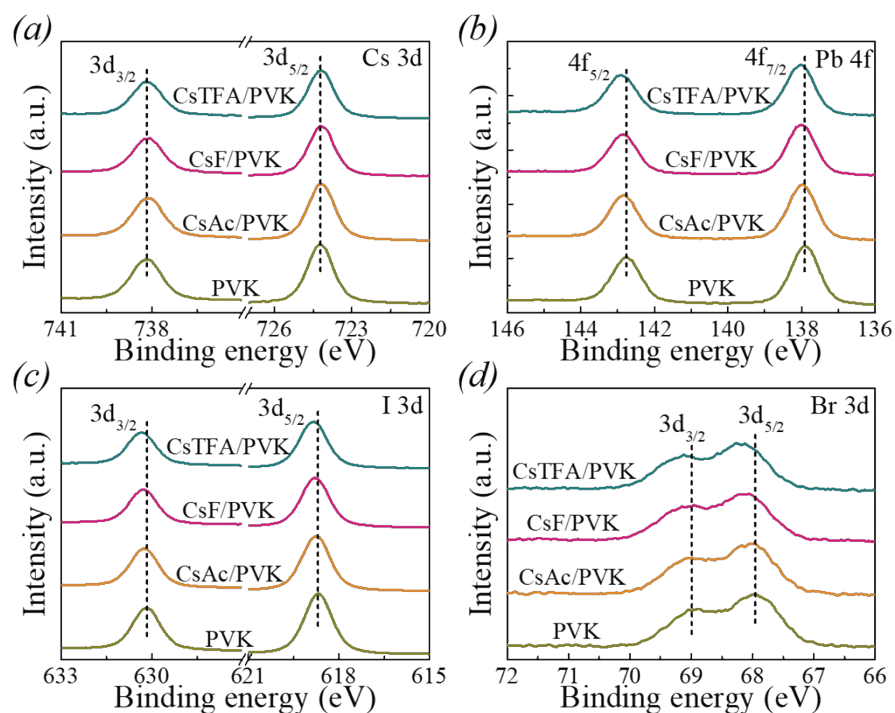

**Fig. S17** (a) Cs 3d, (b) Pb 4s, (c) I 3d, and (d) Br 3d XPS spectra of CsPbI<sub>2</sub>Br films on the cesium modulator films.

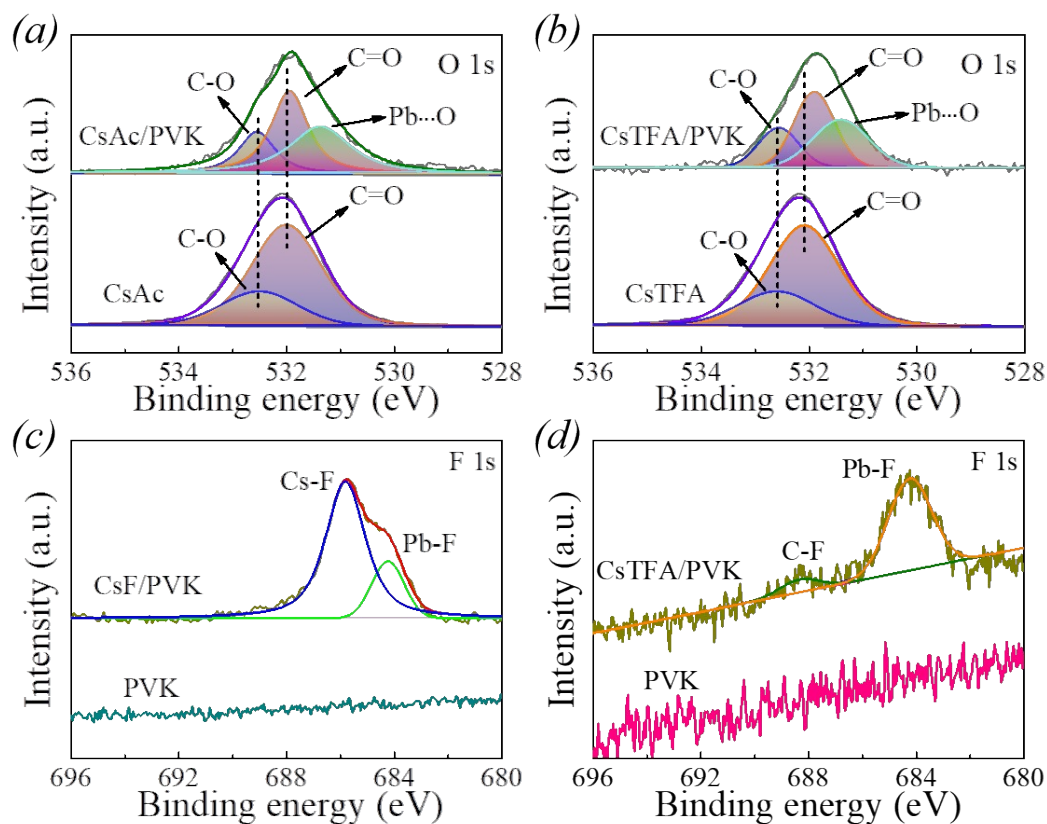

**Fig. S18** O 1s XPS spectra of (a) CsAc and CsAc/PVK and (b) CsTFA and CsTFA/PVK. F 1s XPS spectra of (c) PVK and CsF/PVK and (d) PVK and CsTFA/PVK. Note: PVK stands for CsPbI<sub>2</sub>Br.

To study the the interaction between cesium modulators and perovskite films, we firstly spin-coated 0.5 M cesium modulator precursor solution dissolved in 2-Methoxyethanol/ethanolamine onto the glass substrate, then spin-coated 0.1 M CsPbI<sub>2</sub>Br precursor solution onto the cesium modulator films, and finally obtained the samples with a structure of glass/cesium modulators/CsPbI<sub>2</sub>Br to measure XPS spectra.

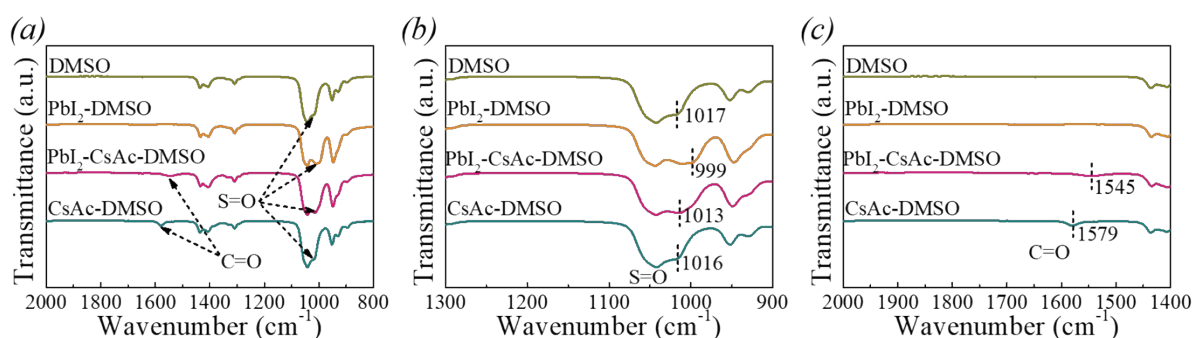

**Fig. S19** (a) FTIR spectra and (b-c) fingerprint regions of DMSO (liquid), PbI<sub>2</sub>-DMSO (power), PbI<sub>2</sub>-CsAc-DMSO (power), and CsAc-DMSO (power). Mixed powders were obtained by adding them in DMSO solvents at 80 °C under stirring for 24 h, followed by removing the solvents by rotary evaporation and drying in a vacuum oven at 65 °C for 48 h.

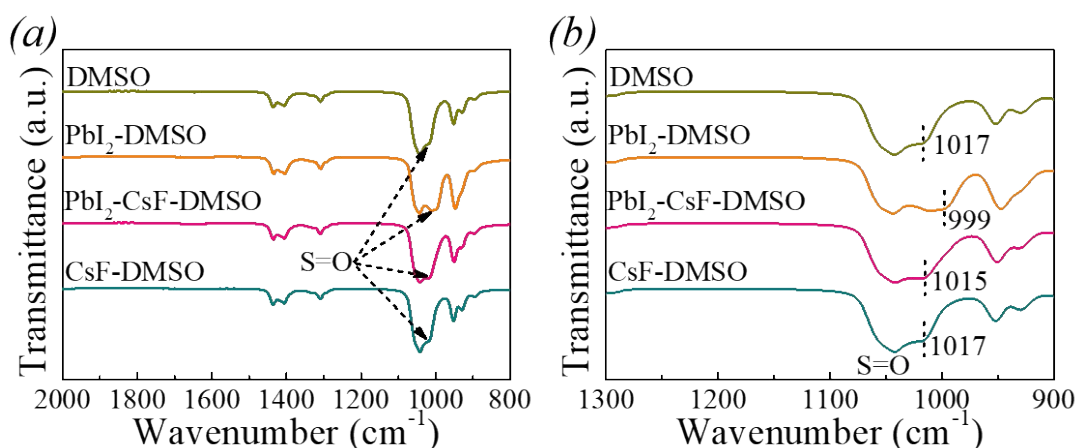

**Fig. S20** (a) FTIR spectra and (b) fingerprint regions of DMSO (liquid), PbI<sub>2</sub>-DMSO (power), PbI<sub>2</sub>-CsF-DMSO (power), and CsF-DMSO (power). Mixed powders were obtained by adding them in DMSO solvents at 80 °C under stirring for 24 h, followed by removing the solvents by rotary evaporation and drying in a vacuum oven at 65 °C for 48 h.

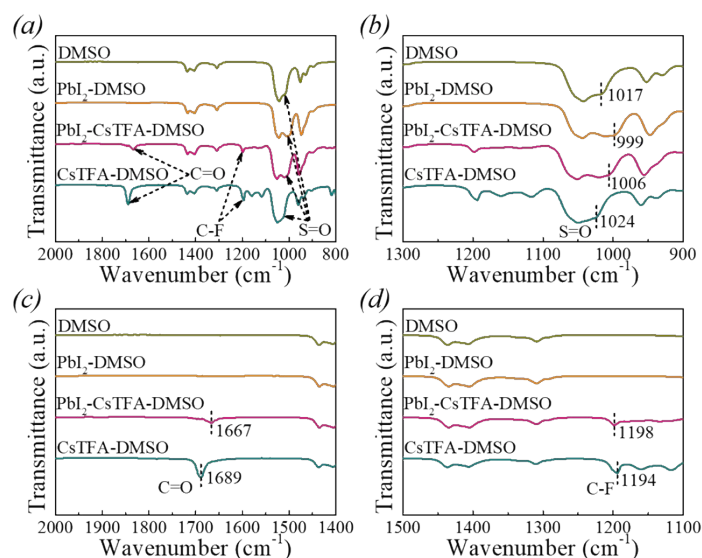

**Fig. S21** (a) FTIR spectra and (b-d) fingerprint regions of DMSO (liquid),  $\text{PbI}_2$ -DMSO (power),  $\text{PbI}_2$ -CsTFA-DMSO (power), and CsTFA-DMSO (power). Mixed powders were obtained by adding them in DMSO solvents at 80 °C under stirring for 24 h, followed by removing the solvents by rotary evaporation and drying in a vacuum oven at 65 °C for 48 h.

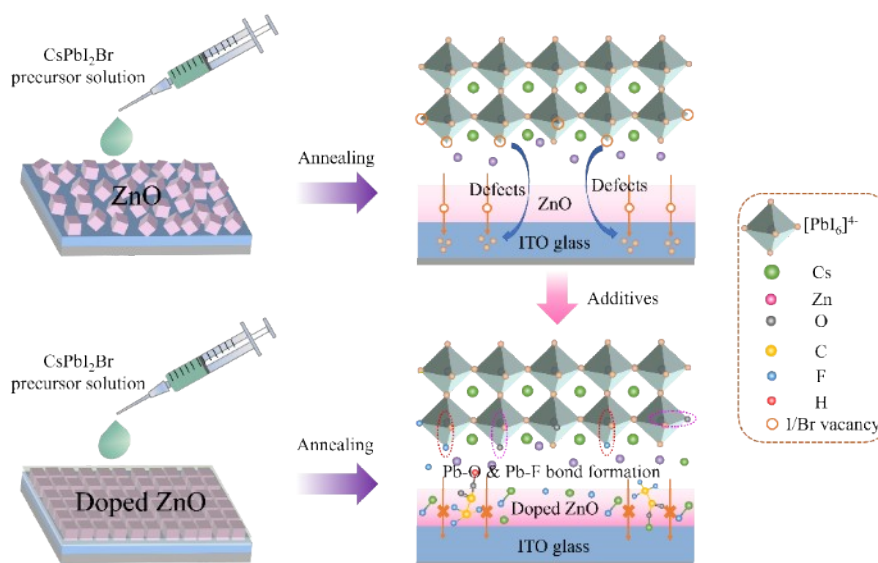

**Fig. S22** Schematic illustration of the halide ion migration and passivation mechanism of  $\text{CsPbI}_2\text{Br}$  films on the different ETLs.

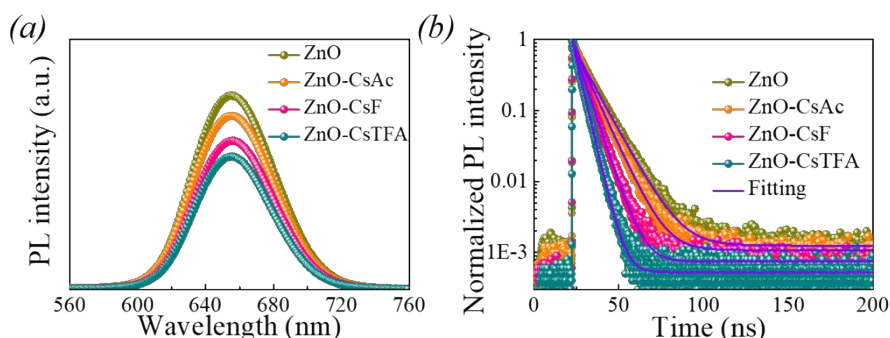

**Fig. S23** (a) Steady-state PL and (b) TRPL decay spectra of  $\text{CsPbI}_2\text{Br}$  films on the pristine and doped ZnO ETLs.

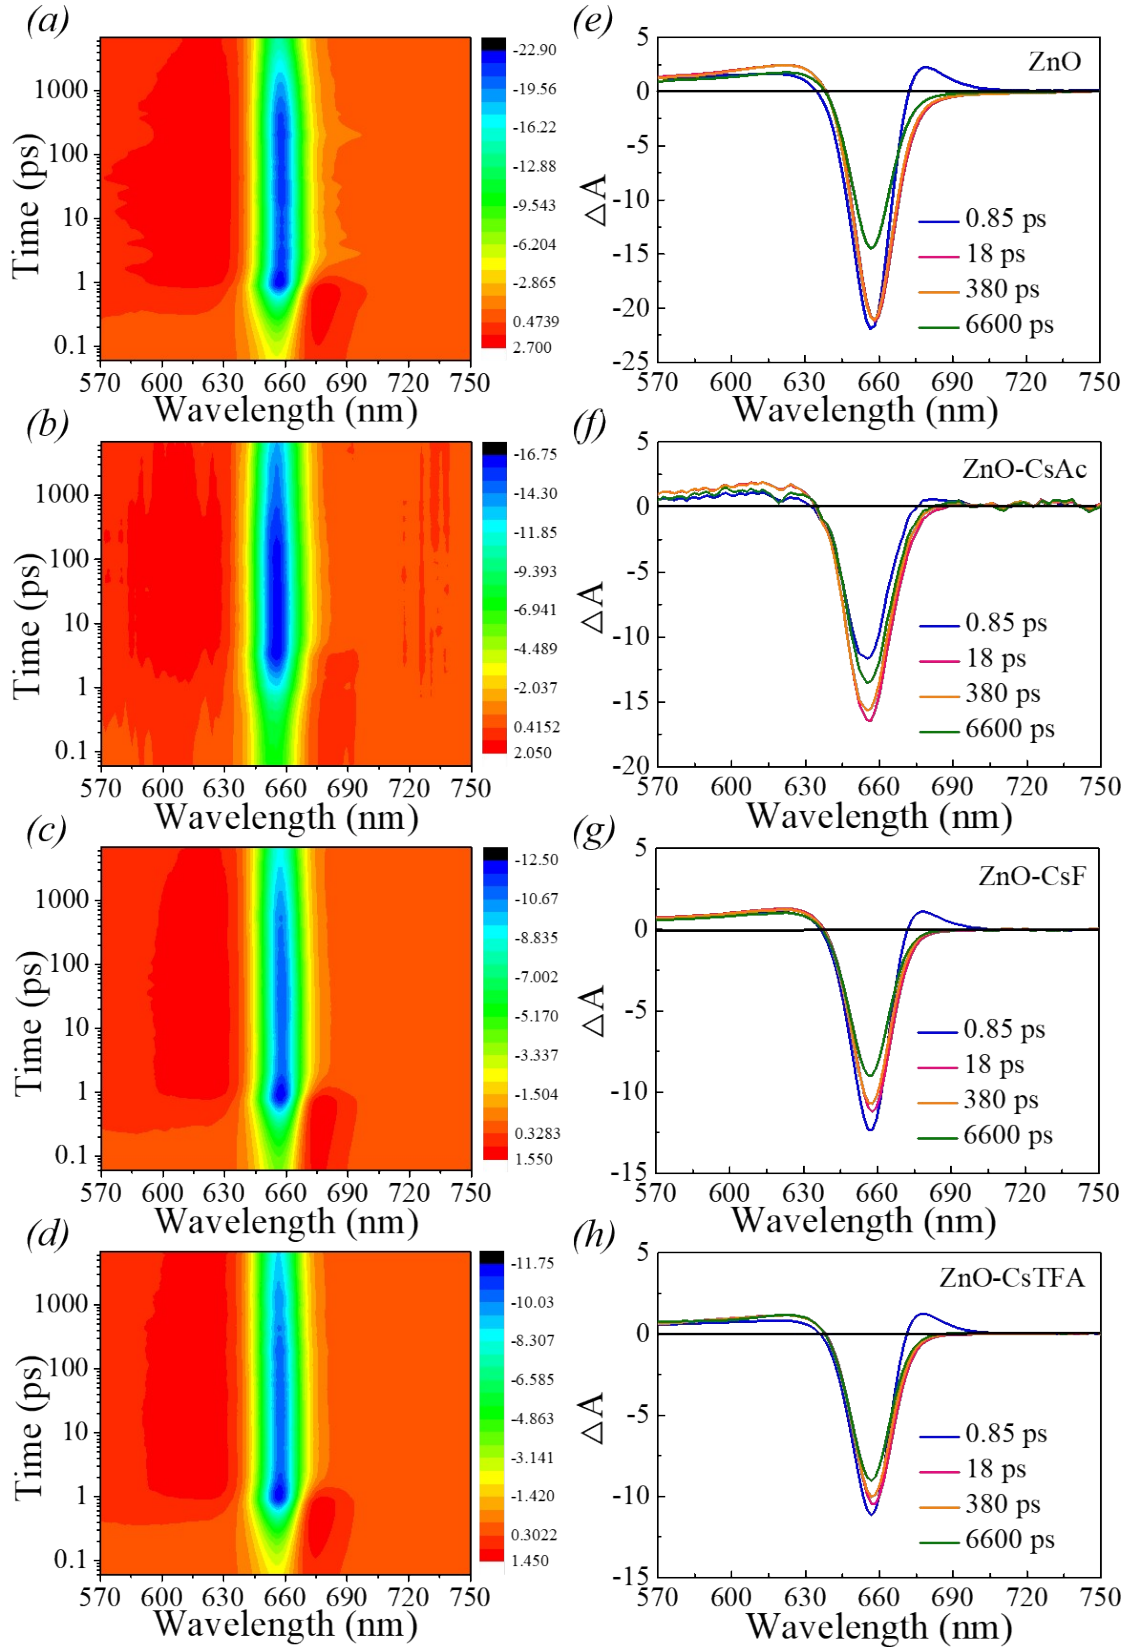

**Fig. S24** Two-dimensional pseudocolor plots of TA spectra for CsPbI<sub>2</sub>Br films on the (a) ZnO, (b) ZnO-CsAc, (c) ZnO-CsF, and (d) ZnO-CsTFA ETLs. TA spectra of CsPbI<sub>2</sub>Br films on the (e) ZnO, (f) ZnO-CsAc, (g) ZnO-CsF, and (h) ZnO-CsTFA ETLs.

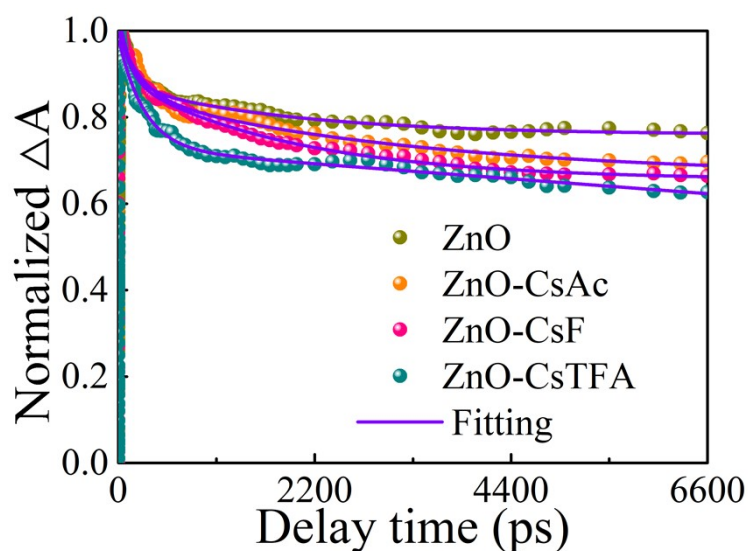

**Fig. S25** Normalized kinetic decay traces of PB negative peak for CsPbI<sub>2</sub>Br films on the pristine and doped ZnO ETLs.

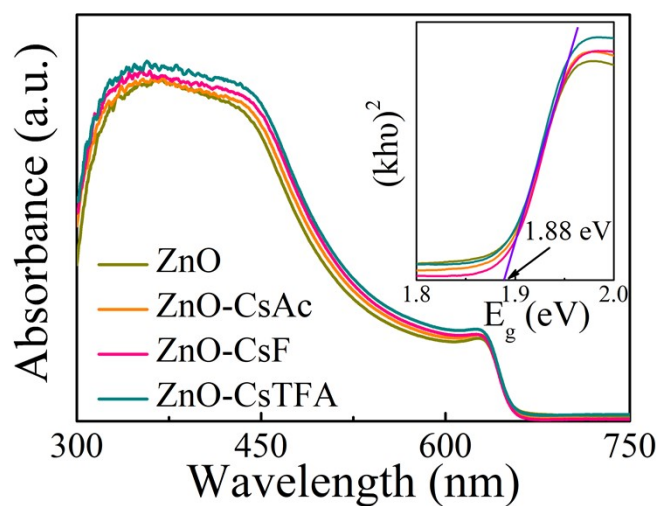

**Fig. S26** UV-vis absorption spectra of CsPbI<sub>2</sub>Br films on the pristine and doped ZnO ETLs. Inset: corresponding  $E_g$  values.

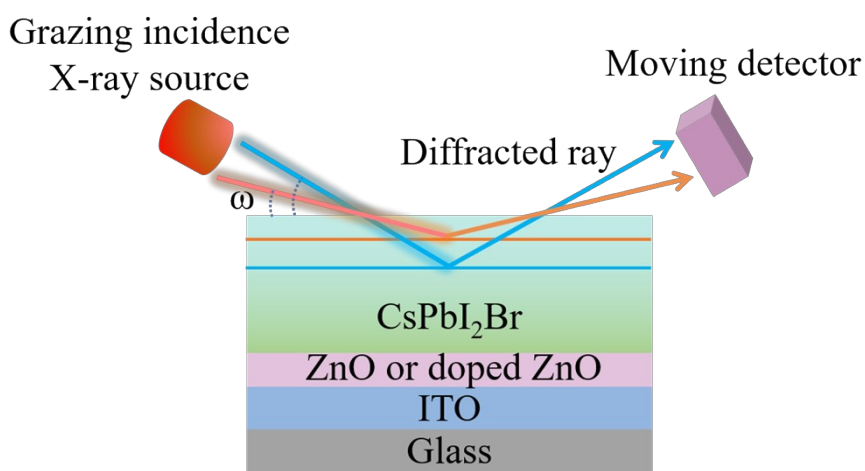

**Fig. S27** Schematic diagram of depth-dependent GIXRD measurement.

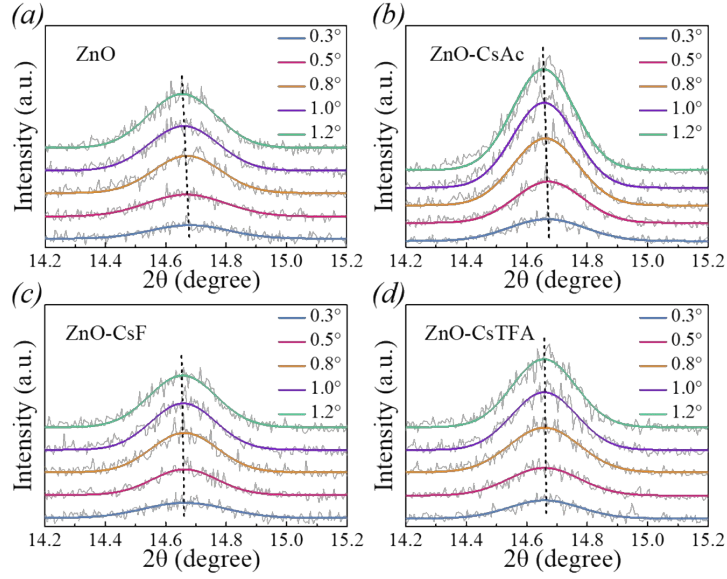

**Fig. S28** Depth-dependent GIXRD plots of CsPbI<sub>2</sub>Br films on the (a) ZnO, (b) ZnO-CsAc, (c) ZnO-CsF, and (d) ZnO-CsTFA ETLs.

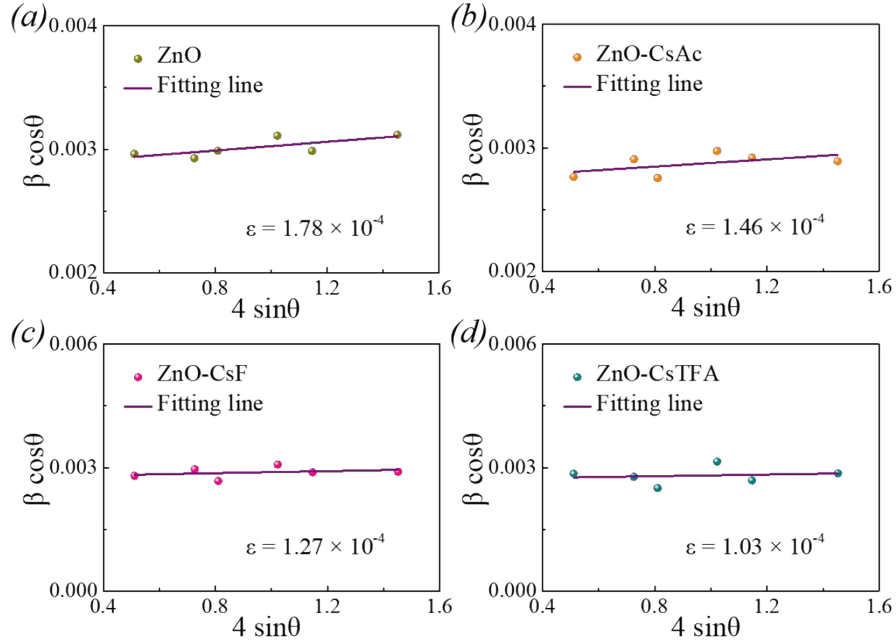

**Fig. S29** Williamson-Hall plots of CsPbI<sub>2</sub>Br films on the (a) ZnO, (b) ZnO-CsAc, (c) ZnO-CsF, and (d) ZnO-CsTFA ETLs.

The residual strain of CsPbI<sub>2</sub>Br films can be evaluated from the XRD patterns (Fig. 4i) by Williamson-Hall analysis:<sup>8,9</sup>

$$\beta \cos\theta = \varepsilon(4\sin\theta) + \frac{k\lambda}{D} \quad \text{Equation S2}$$

where  $\beta$  is the FWHM of XRD peak,  $\theta$  is the diffraction angle,  $\varepsilon$  is the residual strain (the slope of fitted line),  $k$  is the shape factor that is 0.9 for a cubic structure,  $\lambda$  is the wavelength of X-ray source, and  $D$  is the crystallite size.

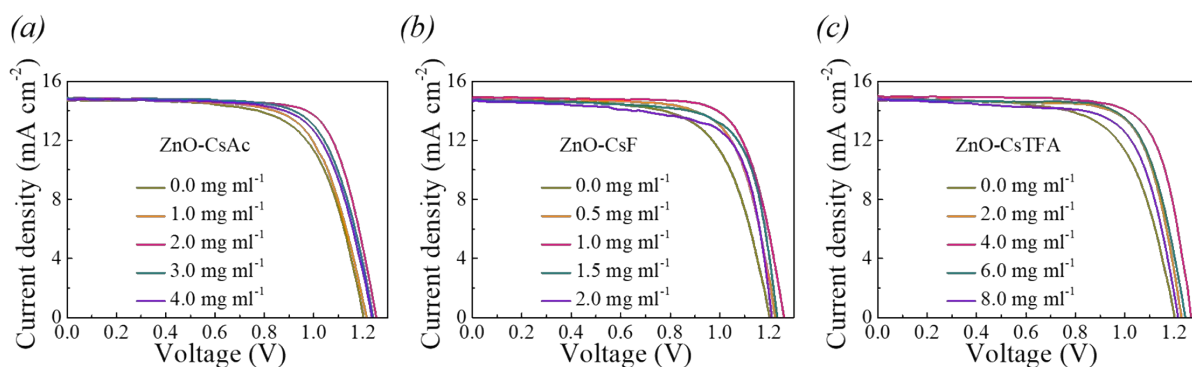

**Fig. S30** J-V curves for C-IPSCs modified with different cesium modulators concentration.

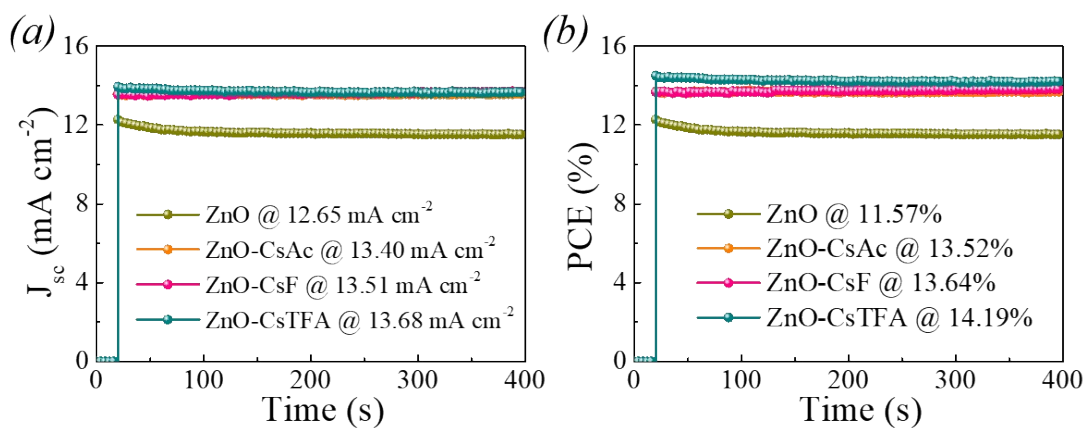

**Fig. S31** Steady-state (a)  $J_{sc}$  and (b) PCE profile at the maximum power point.

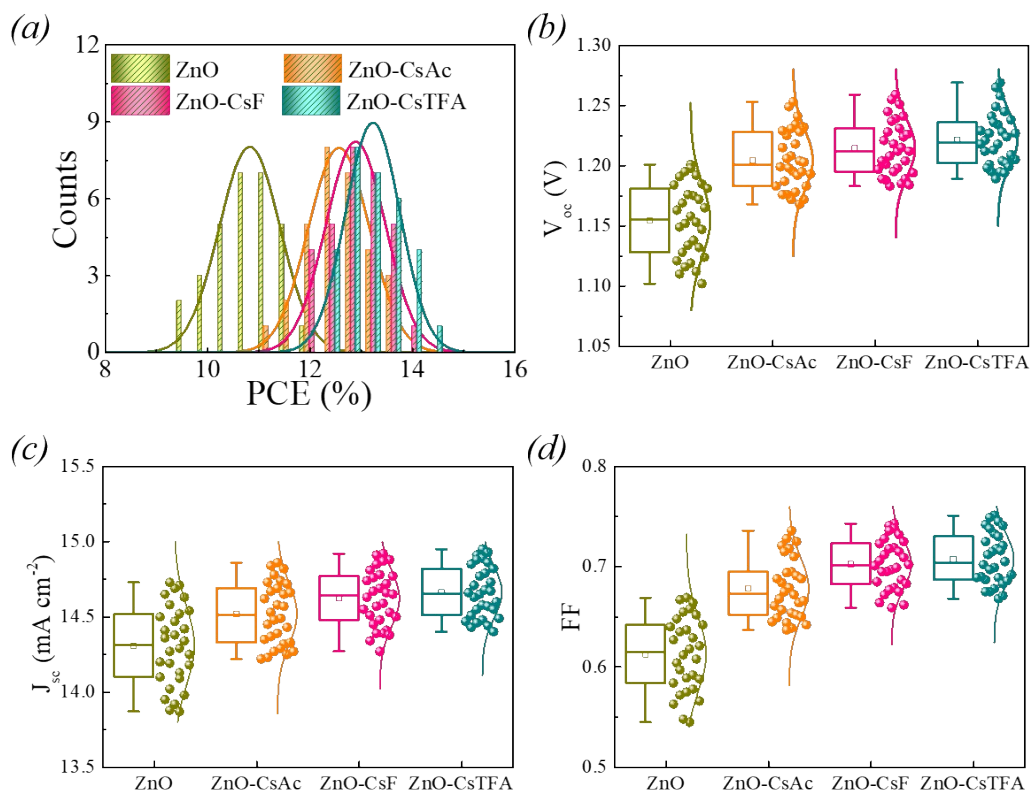

**Fig. S32** (a) PCE, (b)  $V_{oc}$ , (c)  $J_{sc}$ , and (d) FF distributions from 30 individual devices.



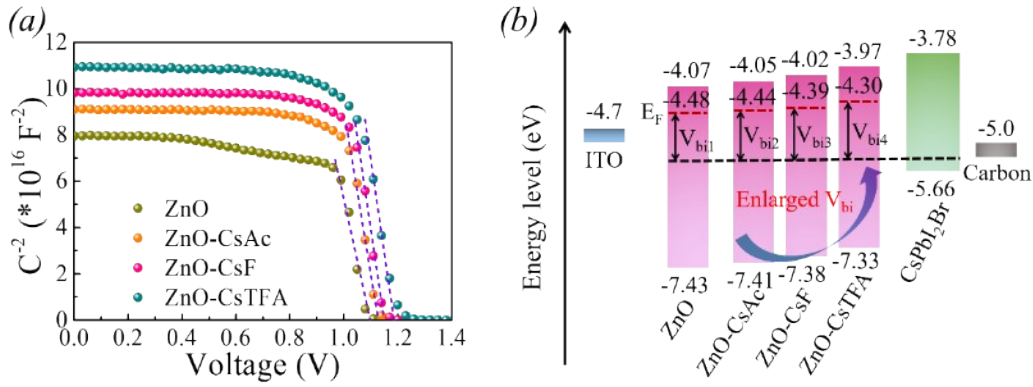

**Fig. S33** (a)  $C^{-2}$ -V plots of C-IPSCs. (b) Schematic illustration of the built-in potential ( $V_{bi}$ ) behavior of C-IPSCs based on the pristine and doped ZnO ETLs.

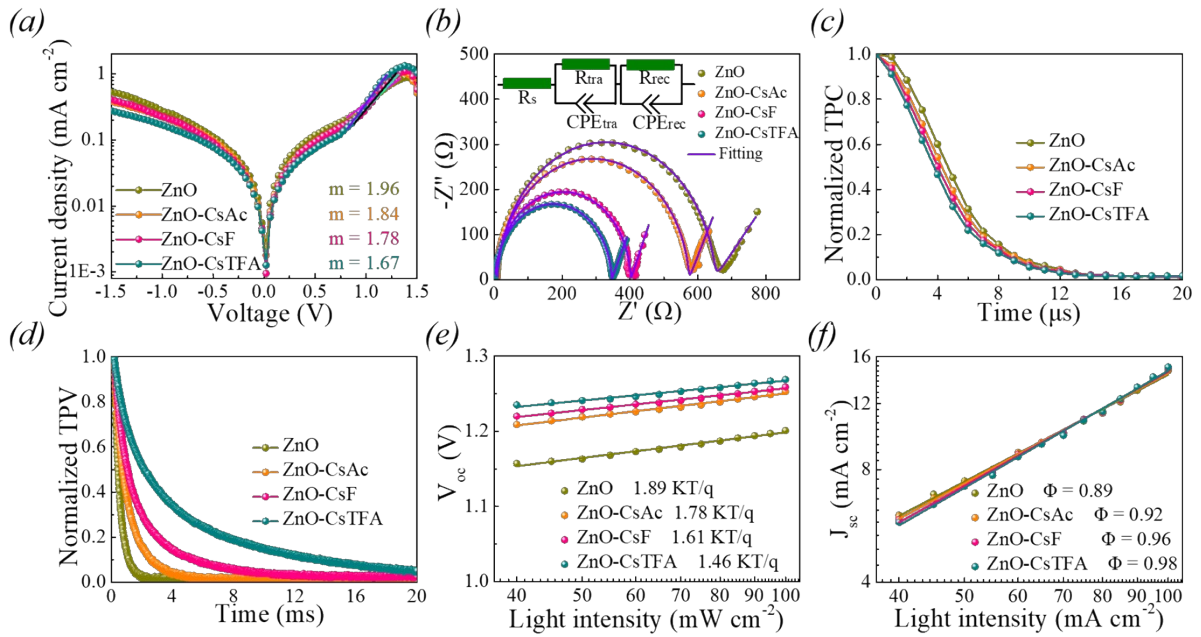

**Fig. S34** (a) Dark J-V curves of C-IPSCs. (b) Nyquist plots under illumination condition at 1.2 V. Inset: equivalent circuit model. (c) Normalized TPC and (d) TPV decay curves of C-IPSCs. (e)  $V_{oc}$  and (f)  $J_{sc}$  dependence on different  $P_{light}$  of C-IPSCs.

The ideality factor ( $m$ ) of dark J-V curve is obtained by the Equation S3:<sup>10</sup>

$$m = \frac{KT \ln j}{q \, dV} \quad \text{Equation S3}$$

The  $V_{oc}$  versus  $P_{light}$  relationship is fitted by the Equation S4:<sup>11</sup>

$$V_{oc} = \frac{nKT}{q} \ln(P_{light}) + \text{constant} \quad \text{Equation S4}$$

The  $J_{sc}$  versus  $P_{light}$  relationship is fitted by a power-law equation:<sup>11</sup>

$$J_{sc} \propto P_{light}^{\Phi} \quad \Phi \leq 1 \quad \text{Equation S5}$$

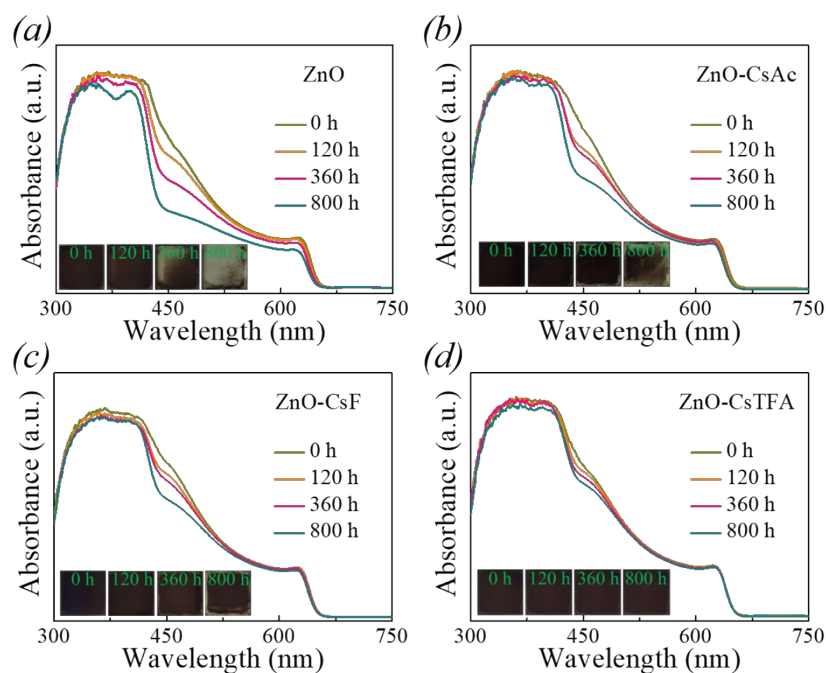

**Fig. S35** Temporal evolution of UV-vis absorption spectra for moisture-aged CsPbI<sub>2</sub>Br films on the (a) ZnO, (b) ZnO-CsAc, (c) ZnO-CsF, and (d) ZnO-CsTFA ETLs. Inset: photographs of morphology changes for CsPbI<sub>2</sub>Br films.

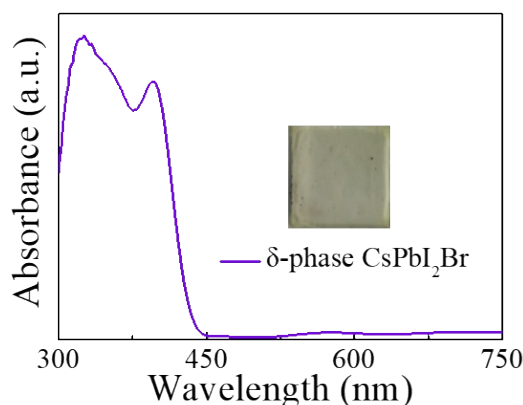

**Fig. S36** UV-vis absorption spectra of  $\delta$ -phase CsPbI<sub>2</sub>Br films. Inset: corresponding photograph.

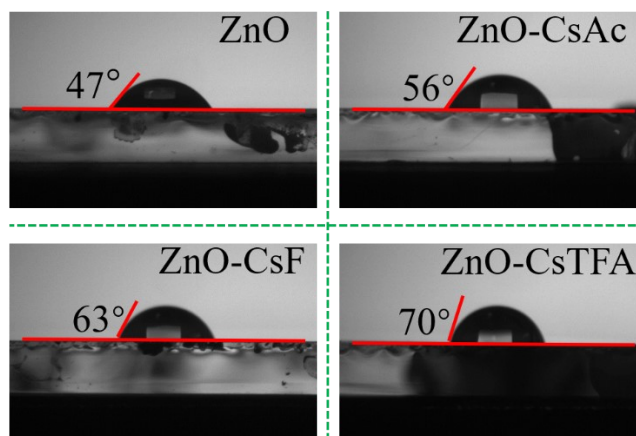

**Fig. S37** Water contact angles of CsPbI<sub>2</sub>Br films on the pristine and doped ZnO ETLs.

## Table Section

**Table S1** Position, area (S), and S ratio of deconvoluted O 1s peaks for pristine and doped ZnO ETLs.

| O 1s            |                                                                                       | ZnO      | ZnO-CsAc | ZnO-CsF | ZnO-CsTFA |
|-----------------|---------------------------------------------------------------------------------------|----------|----------|---------|-----------|
| O <sub>L</sub>  | Position (eV)                                                                         | 529.79   | 529.94   | 529.90  | 530.15    |
|                 | S <sub>L</sub>                                                                        | 56219.48 | 71382.2  | 92583.1 | 99929.0   |
| O <sub>V</sub>  | Position (eV)                                                                         | 531.17   | 531.19   | 531.00  | 531.34    |
|                 | S <sub>V</sub>                                                                        | 30216.9  | 34819.2  | 32017.2 | 20840.2   |
| O <sub>OH</sub> | Position (eV)                                                                         | 532.16   | 532.24   | 531.88  | 532.07    |
|                 | S <sub>OH</sub>                                                                       | 10626.6  | 11592.7  | 18130.1 | 12000.0   |
| S ratio         | S <sub>L</sub> /(S <sub>L</sub> + S <sub>V</sub> + S <sub>OH</sub> )                  | 0.58     | 0.61     | 0.65    | 0.75      |
|                 | S <sub>V</sub> /(S <sub>L</sub> + S <sub>V</sub> + S <sub>OH</sub> )                  | 0.31     | 0.29     | 0.22    | 0.16      |
|                 | S <sub>OH</sub> /(S <sub>L</sub> + S <sub>V</sub> + S <sub>OH</sub> )                 | 0.11     | 0.10     | 0.13    | 0.09      |
|                 | S <sub>V</sub> +S <sub>OH</sub> /(S <sub>L</sub> + S <sub>V</sub> + S <sub>OH</sub> ) | 0.42     | 0.39     | 0.35    | 0.25      |

**Table S2** The calculated  $\sigma$  values of pristine and doped ZnO ETLs.

| ETL       | Slop [I/V] | Device area (cm <sup>2</sup> ) | Thickness (nm) | $\sigma$ (mS cm <sup>-1</sup> ) |
|-----------|------------|--------------------------------|----------------|---------------------------------|
| ZnO       | 50.18      | 0.09                           | 40             | $2.23 \times 10^{-3}$           |
| ZnO-CsAc  | 61.41      | 0.09                           | 40             | $2.73 \times 10^{-3}$           |
| ZnO-CsF   | 66.83      | 0.09                           | 40             | $2.97 \times 10^{-3}$           |
| ZnO-CsTFA | 71.38      | 0.09                           | 40             | $3.17 \times 10^{-3}$           |

The  $\sigma$  values of pristine and doped ZnO ETLs are calculated from the slopes (I/V) of dark current-voltage (I-V) curves according to the Equation S6:<sup>12</sup>

$$\sigma = \frac{Id}{VA} \quad \text{Equation S6}$$

where A represents the device area (0.09 cm<sup>2</sup>).

**Table S3** The calculated  $\mu_e$  values of pristine and doped ZnO ETLs.

| ETL       | Thickness (nm) | $\mu_e$ (cm <sup>2</sup> V <sup>-1</sup> s <sup>-1</sup> ) |
|-----------|----------------|------------------------------------------------------------|
| ZnO       | 40             | $6.57 \times 10^{-3}$                                      |
| ZnO-CsAc  | 40             | $6.86 \times 10^{-3}$                                      |
| ZnO-CsF   | 40             | $7.07 \times 10^{-3}$                                      |
| ZnO-CsTFA | 40             | $7.15 \times 10^{-3}$                                      |

The SCLC model is applied to electron-only device (glass/ITO/Ag/pristine or doped ZnO/Ag) to estimate the  $\mu_e$  values of pristine and doped ZnO ETLs, as follows:<sup>11</sup>

$$\mu_e = \frac{8Jd^3}{9\varepsilon_0\varepsilon_iV^2} \quad \text{Equation S7}$$

**Table S4** Relative normalized peak intensity and FWHM of pristine and doped ZnO ETLs.

| ETL       | (100) relative normalized peak intensity | FWHM of (100) (degree) | (110) relative normalized peak intensity | FWHM of (110) (degree) |
|-----------|------------------------------------------|------------------------|------------------------------------------|------------------------|
| ZnO       | 0.70                                     | 0.52                   | 0.65                                     | 0.53                   |
| ZnO-CsAc  | 0.87                                     | 0.49                   | 0.77                                     | 0.46                   |
| ZnO-CsF   | 0.91                                     | 0.41                   | 0.82                                     | 0.42                   |
| ZnO-CsTFA | 1.00                                     | 0.39                   | 1.00                                     | 0.31                   |

**Table S5** Detailed parameters derived from the UPS spectra for pristine and ZnO ETLs.

| ETL       | $E_{\text{onset}}$ (eV) | $E_{\text{offset}}$ (eV) | VBM (eV) | CBM (eV) | $E_F$ (eV) | $W_F$ (eV) | $E_g$ (eV) |
|-----------|-------------------------|--------------------------|----------|----------|------------|------------|------------|
| ZnO       | 2.95                    | 16.74                    | -7.43    | -4.07    | -4.48      | 4.48       | 3.36       |
| ZnO-CsAc  | 2.97                    | 16.78                    | -7.41    | -4.05    | -4.44      | 4.44       | 3.36       |
| ZnO-CsF   | 2.99                    | 16.83                    | -7.38    | -4.02    | -4.39      | 4.39       | 3.36       |
| ZnO-CsTFA | 3.03                    | 16.92                    | -7.33    | -3.97    | -4.30      | 4.30       | 3.36       |

The work function ( $W_F$ ) and Fermi level ( $E_F$ ) values of pristine and doped ZnO ETLs are estimated according to the following Equations S8 and S9:<sup>13</sup>

$$W_F = E_{cutoff} - 21.22 \quad \text{Equation S8}$$

$$E_F = -W_F \quad \text{Equation S9}$$

The valence band maximum (VBM) and conduction band minimum (CBM) values are calculated by the following Equations S10 and S11:<sup>11</sup>

$$VBM = E_{offset} - E_{onset} - 21.22 \quad \text{Equation S10}$$

$$CBM = VBM + E_g \quad \text{Equation S11}$$

**Table S6** Relative normalized peak intensity and FWHM of CsPbI<sub>2</sub>Br films on the pristine and doped ZnO ETLs.

| CsPbI <sub>2</sub> Br | (100) relative normalized peak intensity | FWHM of (100) (degree) | (200) relative normalized peak intensity | FWHM of (200) (degree) |
|-----------------------|------------------------------------------|------------------------|------------------------------------------|------------------------|
| ZnO                   | 0.55                                     | 0.171                  | 0.57                                     | 0.226                  |
| ZnO-CsAc              | 0.74                                     | 0.163                  | 0.78                                     | 0.218                  |
| ZnO-CsF               | 0.84                                     | 0.159                  | 0.89                                     | 0.209                  |
| ZnO-CsTFA             | 1.00                                     | 0.155                  | 1.00                                     | 0.203                  |

**Table S7** Fitting parameters of TRPL decay spectra based on the glass/ITO/ZnO/CsPbI<sub>2</sub>Br, glass/ITO/ZnO-CsAc/CsPbI<sub>2</sub>Br, glass/ITO/ZnO-CsF/CsPbI<sub>2</sub>Br, and glass/ITO/ZnO-CsTFA/CsPbI<sub>2</sub>Br samples.

| Sample                                    | A <sub>1</sub> | τ <sub>1</sub> (ns) | τ <sub>1</sub> (%) | A <sub>2</sub> | τ <sub>2</sub> (ns) | τ <sub>2</sub> (%) | τ <sub>pl</sub> (ns) |
|-------------------------------------------|----------------|---------------------|--------------------|----------------|---------------------|--------------------|----------------------|
| glass/ITO/ZnO/CsPbI <sub>2</sub> Br       | 0.80           | 9.97                | 94.99              | 0.16           | 2.63                | 5.01               | 9.60                 |
| glass/ITO/ZnO-CsAc/CsPbI <sub>2</sub> Br  | 0.82           | 8.30                | 98.55              | 0.10           | 1.00                | 1.45               | 8.19                 |
| glass/ITO/ZnO-CsF/CsPbI <sub>2</sub> Br   | 0.83           | 6.11                | 97.11              | 0.18           | 0.84                | 2.89               | 5.96                 |
| glass/ITO/ZnO-CsTFA/CsPbI <sub>2</sub> Br | 0.85           | 4.33                | 96.31              | 0.17           | 0.83                | 3.69               | 4.20                 |

The TRPL decay spectrum is fitted by the bi-exponential function (Equation S12):<sup>11</sup>

$$y(t) = A_1 e^{-t/\tau_1} + A_2 e^{-t/\tau_2} + y_0 \quad \text{Equation S12}$$

where A<sub>1</sub> and A<sub>2</sub> represent weighting coefficients of each decay channel, τ<sub>1</sub> and τ<sub>2</sub> are first- and second-order decay times, y<sub>0</sub> is a constant.

The average PL lifetime (τ<sub>pl</sub>) of TRPL decay spectra can be calculated by the following Equation S13:<sup>11</sup>

$$\tau_{pl} = \frac{A_1\tau_1}{A_1\tau_1 + A_2\tau_2}\tau_1 + \frac{A_2\tau_2}{A_1\tau_1 + A_2\tau_2}\tau_2 \quad \text{Equation S13}$$

**Table S8** Fitting parameters of TA spectra based on the glass/ITO/ZnO/CsPbI<sub>2</sub>Br, glass/ITO/ZnO-CsAc/CsPbI<sub>2</sub>Br, glass/ITO/ZnO-CsF/CsPbI<sub>2</sub>Br, and glass/ITO/ZnO-CsTFA/CsPbI<sub>2</sub>Br samples.

| Sample                                    | A <sub>1</sub> | τ <sub>1</sub><br>(ps) | τ <sub>1</sub><br>(%) | A <sub>2</sub> | τ <sub>2</sub><br>(ps) | τ <sub>1</sub><br>(%) | τ <sub>ta</sub><br>(ps) |
|-------------------------------------------|----------------|------------------------|-----------------------|----------------|------------------------|-----------------------|-------------------------|
| glass/ITO/ZnO/CsPbI <sub>2</sub> Br       | 0.19           | 3243.70                | 94.18                 | 0.15           | 253.87                 | 5.82                  | 3069.71                 |
| glass/ITO/ZnO-CsAc/CsPbI <sub>2</sub> Br  | 0.24           | 2931.07                | 97.58                 | 0.14           | 124.44                 | 2.42                  | 2863.24                 |
| glass/ITO/ZnO-CsF/CsPbI <sub>2</sub> Br   | 0.23           | 2873.22                | 93.11                 | 0.17           | 287.90                 | 6.89                  | 2694.95                 |
| glass/ITO/ZnO-CsTFA/CsPbI <sub>2</sub> Br | 0.12           | 1876.59                | 92.17                 | 0.14           | 136.73                 | 7.83                  | 1740.28                 |

The kinetic decay trace of PB negative peak is fitted by the Equation S12. The average TA lifetime (τ<sub>ta</sub>) is calculated by the Equation S13.

**Table S9** The calculated N<sub>t</sub> values of CsPbI<sub>2</sub>Br films on the pristine and doped ZnO ETLs.

| Device                                              | ZnO   | ZnO-CsAc | ZnO-CsF | ZnO-CsTFA |
|-----------------------------------------------------|-------|----------|---------|-----------|
| V <sub>TFL</sub> (V)                                | 1.045 | 1.015    | 0.994   | 0.899     |
| N <sub>t</sub> (10 <sup>15</sup> cm <sup>-3</sup> ) | 5.639 | 5.477    | 5.363   | 4.851     |

The SCLC model was applied to electron-only device (glass/ITO/pristine or doped ZnO/CsPbI<sub>2</sub>Br/PC<sub>61</sub>BM/Ag) to quantitatively estimate the trap state density (N<sub>t</sub>) values of perovskite films. The relative permittivity of CsPbI<sub>2</sub>Br is 8.5.<sup>7</sup> The trap-filled limit voltage (V<sub>TFL</sub>) is the voltage at the kink point.

**Table S10** Photovoltaic parameters of C-IPSCs based on the CsAc-modulated ZnO ETLs prepared with different CsAc concentrations.

| Concentration<br>(mg ml <sup>-1</sup> ) | V <sub>oc</sub> (V) | J <sub>sc</sub> (mA cm <sup>-2</sup> ) | FF    | PCE (%) |
|-----------------------------------------|---------------------|----------------------------------------|-------|---------|
| 0.0                                     | 1.201               | 14.71                                  | 0.669 | 11.82   |
| 1.0                                     | 1.219               | 14.81                                  | 0.682 | 12.31   |
| 2.0                                     | 1.253               | 14.86                                  | 0.736 | 13.70   |
| 3.0                                     | 1.240               | 14.84                                  | 0.712 | 13.10   |
| 4.0                                     | 1.235               | 14.75                                  | 0.701 | 12.77   |

**Table S11** Photovoltaic parameters of C-IPSCs based on the CsF-modulated ZnO ETLs prepared with different CsF concentrations.

| Concentration<br>(mg ml <sup>-1</sup> ) | V <sub>oc</sub> (V) | J <sub>sc</sub> (mA cm <sup>-2</sup> ) | FF    | PCE (%) |
|-----------------------------------------|---------------------|----------------------------------------|-------|---------|
| 0.0                                     | 1.201               | 14.71                                  | 0.669 | 11.82   |
| 0.5                                     | 1.224               | 14.86                                  | 0.717 | 13.04   |
| 1.0                                     | 1.259               | 14.92                                  | 0.743 | 13.96   |
| 1.5                                     | 1.233               | 14.78                                  | 0.728 | 13.27   |
| 2.0                                     | 1.211               | 14.68                                  | 0.715 | 12.71   |

**Table S12** Photovoltaic parameters of C-IPSCs based on the CsTFA-modulated ZnO ETLs prepared with different CsTFA concentrations.

| Concentration<br>(mg ml <sup>-1</sup> ) | V <sub>oc</sub> (V) | J <sub>sc</sub> (mA cm <sup>-2</sup> ) | FF    | PCE (%) |
|-----------------------------------------|---------------------|----------------------------------------|-------|---------|
| 0.0                                     | 1.201               | 14.71                                  | 0.669 | 11.82   |
| 2.0                                     | 1.230               | 14.87                                  | 0.736 | 13.46   |
| 4.0                                     | 1.269               | 14.95                                  | 0.751 | 14.25   |
| 6.0                                     | 1.245               | 14.81                                  | 0.734 | 13.53   |
| 8.0                                     | 1.216               | 14.73                                  | 0.707 | 12.66   |

**Table S13** Photovoltaic parameters of C-IPSCs in both the reverse scan (RS) and forward scan (FS) directions. The hysteresis index (HI) is defined as:  $HI = (PCE_{RS} - PCE_{FS})/PCE_{RS}$ .

| Device    | Scan<br>direction | V <sub>oc</sub> (V) | J <sub>sc</sub> (mA cm <sup>-2</sup> ) | FF    | PCE (%) | HI    |
|-----------|-------------------|---------------------|----------------------------------------|-------|---------|-------|
| ZnO       | RS                | 1.201               | 14.71                                  | 0.669 | 11.82   | 0.107 |
|           | FS                | 1.187               | 14.69                                  | 0.605 | 10.55   |       |
| ZnO-CsAc  | RS                | 1.253               | 14.86                                  | 0.736 | 13.70   | 0.056 |
|           | FS                | 1.244               | 14.83                                  | 0.701 | 12.93   |       |
| ZnO-CsF   | RS                | 1.259               | 14.92                                  | 0.743 | 13.96   | 0.018 |
|           | FS                | 1.250               | 14.92                                  | 0.735 | 13.71   |       |
| ZnO-CsTFA | RS                | 1.269               | 14.95                                  | 0.751 | 14.25   | 0.050 |
|           | FS                | 1.266               | 14.94                                  | 0.716 | 13.54   |       |

**Table S14** Photovoltaic performance comparisons of ZnO-based C-IPSCs reported so far.

| No. | Perovskite                           | Device structure                                                               | $V_{oc}$ (V) | $J_{sc}$ (mA cm <sup>-2</sup> ) | FF    | PCE (%) | Year | Ref.      |
|-----|--------------------------------------|--------------------------------------------------------------------------------|--------------|---------------------------------|-------|---------|------|-----------|
| 1   | CsPbI <sub>2</sub> Br                | glass/ITO/ZnO-CsTFA/CsPbI <sub>2</sub> Br/carbon                               | 1.269        | 14.95                           | 0.751 | 14.25   | 2023 | This work |
| 2   | CsPbIBr <sub>2</sub>                 | glass/FTO/ZnO/CsPbIBr <sub>2</sub> /carbon                                     | 1.09         | 13.74                           | 0.56  | 8.42    | 2021 | 14        |
| 3   | CsPbI <sub>3-x</sub> Br <sub>x</sub> | glass/FTO/DI H <sub>2</sub> O/ZnO/CsPbI <sub>3-x</sub> Br <sub>x</sub> /carbon | 0.96         | 19.10                           | 0.68  | 12.39   | 2022 | 15        |
| 4   | CsPbI <sub>3</sub>                   | glass/FTO/ZnO/CsPbI <sub>3</sub> /carbon                                       | 0.91         | 17.66                           | 0.68  | 10.95   | 2020 | 16        |
| 5   | CsPbIBr <sub>2</sub>                 | glass/FTO/ZnO/CsPbIBr <sub>2</sub> /carbon                                     | 1.03         | 11.60                           | 0.63  | 7.60    | 2019 | 17        |
| 6   | CsPbIBr <sub>2</sub>                 | glass/FTO/(Ag)ZnO/CsPbIBr <sub>2</sub> /carbon                                 | 0.8          | 8.02                            | 0.42  | 2.70    | 2022 | 18        |

**Table S15** The steady-state  $J_{sc}$  and PCE values derived from the stabilized power output curves for pristine and doped ZnO ETLs.

| Device    | Maximum power point $V_{oc}$ (V) | Steady-state $J_{sc}$ (mA cm <sup>-2</sup> ) | Steady-state PCE (%) |
|-----------|----------------------------------|----------------------------------------------|----------------------|
| ZnO       | 0.915                            | 12.65                                        | 11.57                |
| ZnO-CsAc  | 1.009                            | 13.40                                        | 13.52                |
| ZnO-CsF   | 1.010                            | 13.51                                        | 13.64                |
| ZnO-CsTFA | 1.037                            | 13.68                                        | 14.19                |

**Table S16** The  $V_{bi}$  values obtained from C<sup>-2</sup>-V plots.

| Device       | ZnO   | ZnO-CsAc | ZnO-CsF | ZnO-CsTFA |
|--------------|-------|----------|---------|-----------|
| $V_{bi}$ (V) | 1.098 | 1.127    | 1.151   | 1.187     |

The  $V_{bi}$  values were extracted based on Mott-Schottky analysis, and the relevant equation is as follows:<sup>19</sup>

$$C^{-2} = \frac{2(V_{bi} - V)}{A^2 \epsilon_0 \epsilon_r q N_A} \quad \text{Equation S14}$$

where  $N_A$  is the carrier concentration.



**Table S17** Fitting parameters obtained from the Nyquist plots of C-IPSCs measured at a bias of 1.20 V under illumination.

| Device    | $R_s$<br>( $\Omega \cdot \text{cm}^2$ ) | $R_{\text{tra}}$<br>( $\Omega \cdot \text{cm}^2$ ) | $\text{CPE}_{\text{tra-T}}$<br>( $\text{nF cm}^{-2}$ ) | $\text{CPE}_{\text{tra-P}}$ | $R_{\text{rec}}$<br>( $\times 10^4 \Omega \cdot \text{cm}^2$ ) | $\text{CPE}_{\text{rec-T}}$<br>( $\times 10^7 \text{nF cm}^{-2}$ ) | $\text{CPE}_{\text{rec-P}}$ |
|-----------|-----------------------------------------|----------------------------------------------------|--------------------------------------------------------|-----------------------------|----------------------------------------------------------------|--------------------------------------------------------------------|-----------------------------|
| ZnO       | 0.78                                    | 57.49                                              | 387.82                                                 | 0.97                        | 8.80                                                           | 2.23                                                               | 0.54                        |
| ZnO-CsAc  | 0.63                                    | 50.97                                              | 397.56                                                 | 0.97                        | 10.17                                                          | 1.98                                                               | 0.70                        |
| ZnO-CsF   | 0.40                                    | 35.79                                              | 155.89                                                 | 0.99                        | 12.17                                                          | 2.16                                                               | 0.74                        |
| ZnO-CsTFA | 0.28                                    | 30.84                                              | 152.89                                                 | 0.99                        | 14.21                                                          | 2.84                                                               | 0.71                        |

**Table S18** Fitting parameters of normalized TPC decay curves.

| Device                                | ZnO  | ZnO-CsAc | ZnO-CsF | ZnO-CsTFA |
|---------------------------------------|------|----------|---------|-----------|
| $\tau_{\text{tra}}$ ( $\mu\text{s}$ ) | 5.66 | 5.16     | 4.83    | 4.50      |

The charge transport time ( $\tau_{\text{tra}}$ ) is obtained from normalized TPC data fitted by a single-exponential function:<sup>11</sup>

$$y(t) = A_3 e^{-t/\tau_{\text{tra}}} + y_0 \quad \text{Equation S15}$$

**Table S19** Fitting parameters of normalized TPV decay curves.

| Device    | $A_1$ | $\tau_1$<br>(ms) | $\tau_1$<br>(%) | $A_2$ | $\tau_2$<br>(ms) | $\tau_2$<br>(%) | $\tau_{\text{rec}}$<br>(ms) |
|-----------|-------|------------------|-----------------|-------|------------------|-----------------|-----------------------------|
| ZnO       | 0.73  | 0.49             | 50.00           | 0.73  | 0.49             | 50.00           | 0.49                        |
| ZnO-CsAc  | 0.95  | 0.92             | 82.70           | 0.04  | 4.57             | 17.30           | 1.55                        |
| ZnO-CsF   | 0.68  | 3.44             | 66.05           | 0.35  | 0.91             | 33.95           | 2.58                        |
| ZnO-CsTFA | 0.48  | 7.99             | 82.27           | 0.57  | 1.45             | 17.73           | 6.83                        |

The normalized TPV data are fitted by the Equation S12. The charge recombination lifetime ( $\tau_{\text{rec}}$ ) is calculated by the Equation S13.

## References

- 1 M. J. Frisch, G. W. Trucks, H. B. Schlegel, G. E. Scuseria, M. A. Robb, J. R. Cheeseman, G. Scalmani, V. Barone, G. A. Petersson, H. Nakatsuji, X. Li, M. Caricato, A. V. Marenich, J. Bloino, B. G. Janesko, R. Gomperts, B. Mennucci, H. P. Hratchian, J. V. Ortiz, A. F. Izmaylov, J. L. Sonnenberg, Williams, F. Ding, F. Lipparini, F. Egidi, J. Goings, B. Peng,

- A. Petrone, T. Henderson, D. Ranasinghe, V. G. Zakrzewski, J. Gao, N. Rega, G. Zheng, W. Liang, M. Hada, M. Ehara, K. Toyota, R. Fukuda, J. Hasegawa, M. Ishida, T. Nakajima, Y. Honda, O. Kitao, H. Nakai, T. Vreven, K. Throssell, J. A. Montgomery Jr., J. E. Peralta, F. Ogliaro, M. J. Bearpark, J. J. Heyd, E. N. Brothers, K. N. Kudin, V. N. Staroverov, T. A. Keith, R. Kobayashi, J. Normand, K. Raghavachari, A. P. Rendell, J. C. Burant, S. S. Iyengar, J. Tomasi, M. Cossi, J. M. Millam, M. Klene, C. Adamo, R. Cammi, J. W. Ochterski, R. L. Martin, K. Morokuma, O. Farkas, J. B. Foresman and D. J. Fox, *Wallingford, CT*, 2016.
- 2 C. Adamo and V. Barone, *J. Chem. Phys.*, 1999, **110**, 6158-6170.
  - 3 D. Andrae, U. Häußermann, M. Dolg, H. Stoll and H. Preuß, *Theor. Chim. Acta*, 1990, **77**, 123-141.
  - 4 R. Krishnan, J. S. Binkley, R. Seeger and J. A. Pople, *J. Chem. Phys.*, 1980, **72**, 650-654.
  - 5 S. Grimme, S. Ehrlich and L. Goerigk, *J. Comput. Chem.*, 2011, **32**, 1456-1465.
  - 6 G. Scalmani and M. J. Frisch, *J. Chem. Phys.*, 2010, **132**, 114110.
  - 7 X. Zhang, N. Gao, Y. Li, L. Xie, X. Yu, X. Lu, X. Gao, J. Gao, L. Shui, S. Wu and J.-M. Liu, *ACS Appl. Energy Mater.*, 2020, **3**, 7832-7843.
  - 8 H. Cheng, C. Liu, J. Zhuang, J. Cao, T. Wang, W.-Y. Wong and F. Yan, *Adv. Funct. Mater.*, 2022, **32**, 2204880.
  - 9 Z. Zheng, F. Li, J. Gong, Y. Ma, J. Gu, X. Liu, S. Chen and M. Liu, *Adv. Mater.*, 2022, **34**, 2109879.
  - 10 S. Xiong, Z. Hou, S. Zou, X. Lu, J. Yang, T. Hao, Z. Zhou, J. Xu, Y. Zeng, W. Xiao, W. Dong, D. Li, X. Wang, Z. Hu, L. Sun, Y. Wu, X. Liu, L. Ding, Z. Sun, M. Fahlman and Q. Bao, *Joule*, 2021, **5**, 467-480.
  - 11 X. Zhang, D. Zhang, Y. Zhou, Y. Du, J. Jin, Z. Zhu, Z. Wang, X. Cui, J. Li, S. Wu, J. Zhang and Q. Tai, *Adv. Funct. Mater.*, 2022, **32**, 2205478.
  - 12 S. Yang, W. Liu, Y. Han, Z. Liu, W. Zhao, C. Duan, Y. Che, H. Gu, Y. Li and S. Liu, *Adv. Energy Mater.*, 2020, **10**, 2002882.
  - 13 T. Wu, R. Zhao, J. Qiu, S. Wang, X. Zhang and Y. Hua, *Adv. Funct. Mater.*, 2022, **32**, 2204450.
  - 14 L. Gong, J.-S. Zhang, C. Wang, H. Fu, Y.-F. Lu, J.-L. Chen, J.-C. Fan and Z.-S. Chao, *ACS Appl. Energy Mater.*, 2021, **4**, 4686-4694.
  - 15 H. Fu, J. Zhang, Y. Li, L. Gong, H. He, Z. Fang, C. Zhou, J. Chen and J. Fan, *J. Mater. Sci.: Mater. Electron.*, 2022, **33**, 3711-3725.
  - 16 J. Zhang, C. Wang, H. Fu, L. Gong, H. He, Z. Fang, C. Zhou, J. Chen, Z. Chao and J. Fan,

- J. Alloys Compd.*, 2021, **862**, 158454.
- 17 C. Wang, J. Zhang, L. Jiang, L. Gong, H. Xie, Y. Gao, H. He, Z. Fang, J. Fan and Z. Chao, *J. Alloys Compd.*, 2020, **817**, 152768.
- 18 Y. Huang, Y. Wu, X. Xu, F. Qin, S. Zhang, J. An, H. Wang and L. Liu, *Chinese Phys. B*, 2022, **31**, 128802.
- 19 Y. Ge, F. Ye, M. Xiao, H. Wang, C. Wang, J. Liang, X. Hu, H. Guan, H. Cui, W. Ke, C. Tao and G. Fang, *Adv. Energy Mater.*, 2022, **12**, 2200361.
